# Genetic analysis of a phenotypic loss in the mechanosensory entrainment of a circalunar clock

Dušica Briševac\*, Celine Prakash\*, Tobias S. Kaiser\*

\* Max Planck Institute for Evolutionary Biology, Max Planck Research Group Biological Clocks,  
August-Thienemann-Strasse 2, 24306 Plön, Germany

**Running title: Genetics of mechanosensory lunar clock entrainment**

**Keywords:** biological clocks, chronobiology, sensory nervous system, mechanotransduction, QTL mapping, whole-genome sequencing, development, graviception, chordotonal organs, signal transducer and activator of transcription (STAT)

**Corresponding author:**

Tobias S. Kaiser\* [kaiser@evolbio.mpg.de](mailto:kaiser@evolbio.mpg.de)

\*Max Planck Institute for Evolutionary Biology, Max Planck Research Group Biological Clocks,  
August-Thienemann-Strasse 2, 24306 Plön, Germany

1 ABSTRACT

2 Genetic variants underlying traits that become either non-adaptive or selectively neutral are expected to  
3 have altered evolutionary trajectories. Uncovering genetic signatures associated with phenotypic loss  
4 presents the opportunity to discover the molecular basis for the phenotype in populations where it  
5 persists. Here we study circalunar clocks in populations of marine midge *Clunio marinus*. The  
6 circalunar clock synchronizes development to the lunar phase, and it is set by moonlight and tidal cycles  
7 of mechanical agitation. Two out of ten studied populations have lost their sensitivity to mechanical  
8 agitation while preserving sensitivity to moonlight. Intriguingly, the F1 offspring of the two insensitive  
9 populations regained the sensitivity to mechanical entrainment, implying a genetically independent loss  
10 of the phenotype. By combining quantitative trait locus mapping and genome-wide screens, we explored  
11 the genetics of this phenotypic loss. QTL analysis suggested an oligogenic origin with one prevalent  
12 additive locus in one of the strains. In addition, it confirmed a distinct genetic architecture in the two  
13 insensitive populations. Genomic screens further uncovered several candidate genes underlying QTL  
14 regions. The strongest signal under the most prominent QTL contains a duplicated *STAT1* gene, which  
15 has a well-established role in development, and *CG022363*, an ortholog of the *Drosophila melanogaster*  
16 *CG32100* gene, which plays a role in gravitaxis. Our results support the notion that adaptive phenotypes  
17 have a complex genetic basis with mutations occurring at several loci. By dissecting the most prevalent  
18 signals, we started to reveal the molecular machinery responsible for the entrainment of the circalunar  
19 clock.

20

## INTRODUCTION

21 Life on earth adapted to anticipate predictable changes in its environment in order to survive, a case in  
22 point is the ubiquity of biological clocks. Due to the earth's rotation around its axis, most living  
23 creatures are exposed to 24-hour cycles, which has resulted in the pervasiveness of circadian clocks  
24 (Pittendrigh 1960; Dunlap and Loros 2017). Furthermore, marine organisms inhabiting intertidal zones  
25 are exposed to tidal cycles of 12.4 hours, which are modulated across the 29.53-day lunar cycle. Thus,  
26 marine organisms have evolved circatidal and circalunar clocks. Due to their universal occurrence,  
27 circadian clocks have been intensely studied over the last century (Wager-Smith and Kay 2000;  
28 Takahashi 2017). Comparatively much less is known about circatidal and circalunar clocks (Kaiser and  
29 Neumann 2021; Goto and Takekata 2015; Andreatta and Tessmar-Raible 2020; Raible et al. 2017),  
30 although some argue that as life evolved in the marine environment circadian clocks may have evolved  
31 from evolutionarily older circatidal or circalunar clocks (Wilcockson and Zhang 2008; Naylor 2010).

32 Biological clocks must be appropriately set to fulfill their role in synchronizing endogenous  
33 physiological processes, reproduction, and behavior to the exogenous environmental cycles.  
34 Environmental variables that reliably fluctuate with geophysical cycles serve as clock synchronizers,  
35 so-called zeitgebers. The most studied zeitgeber is the light-dark cycle that synchronizes the circadian  
36 clock (Pittendrigh 1960). Two other synchronizers of the circadian clock that were experimentally  
37 confirmed are temperature and vibration (López-Olmeda et al. 2006; Simoni et al. 2014; Caldart et al.  
38 2020; Liu et al. 1998). In contrast, many environmental variables fluctuate with the tides and the  
39 following have been shown to serve as strong zeitgebers of the tidal clocks: mechanical disturbance of  
40 the water (Enright 1965; Jones and Naylor 1970; Hastings 1981), changes in hydrostatic pressure (Jones  
41 and Naylor 1970; Gibson 1971; Northcott 1991), temperature fluctuations (Williams and Naylor 1969;  
42 Holmstrom and Morgan 1983), changes in salinity (Taylor and Naylor 1977), immersion and emersion  
43 (Williams and Naylor 1969).

44 Not surprisingly, moonlight was shown to be a unique cue for synchronizing lunar clocks (Hauenschild  
45 1960; Bunning and Müller 1961; Neumann 1966; Saigusa 1980; Franke 1985). Furthermore, several  
46 synchronizers that were first discovered as tidal cues, were consequently demonstrated to be strong

47 zeitgebers for setting circalunar clocks: vibration that accompanies the rise and fall of the tides (Reid  
48 and Naylor 1985; Neumann 1978) and temperature fluctuations (Neumann and Heumbach 1984).  
49 Depending on the stability and robustness of the cycles in the environment that the organism inhabits,  
50 different zeitgebers provide reliable cues for biological clocks in different organisms. Finally, while  
51 biological clocks are not crucial for the survival of all organisms, the harsher the environmental cycles,  
52 the stronger the selection pressure on the presence of reliable biological clocks. Studying organisms  
53 inhabiting these harsh environments promises to give insight into the nature of yet unexplored biological  
54 clocks. One such species whose survival critically depends on its ability to simultaneously synchronize  
55 to lunar and circadian cycles is the marine midge *Clunio marinus*.

56 *Clunio* spends most of its life in a larval stage submerged in the intertidal zone of the Atlantic Ocean.  
57 During full moon and new moon, adults emerge on the sea surface, mate, oviposit eggs and die within  
58 a few hours. Circadian and circalunar clocks allow them to precisely time reproduction to the lowest of  
59 the low tides. Individuals that do not emerge at the appropriate time miss the ecologically suitable low  
60 tide for reproduction and the opportunity to mate and are thus eliminated from the population.  
61 Therefore, strong selection pressure shapes various timing phenotypes in populations that encounter  
62 different tidal regimes along the Atlantic coast (Neumann 1967; Kaiser 2014; Kaiser et al. 2021, 2010,  
63 2011). Moonlight, tidal turbulence and temperature have been shown to be zeitgebers setting the  
64 circalunar clock of *Clunio marinus* (Neumann 1966; Neumann and Heimbach 1978; Neumann and  
65 Heumbach 1984; Neumann 1978). However, different *Clunio* populations are differentially sensitive to  
66 zeitgebers, most likely due to the unreliability of different zeitgebers in certain geographical locations  
67 (Neumann and Heimbach 1978). Neumann discovered one population insensitive to moonlight and two  
68 that were insensitive to tidal turbulence (Neumann and Heimbach 1978). Tidal turbulence was defined  
69 as low frequency, low amplitude vibration that coincides with the rising tide (Neumann and Heimbach  
70 1978). This stimulus shifts every day by 50 minutes resulting in a semi-lunar 14.7 days entrainment  
71 pattern (Neumann and Heimbach 1978).

72 Evolutionary losses of function can have a creative role in evolution (Albalat and Cañestro 2016), and  
73 genetic and genomic analysis of the affected populations can identify the genes involved in

74 corresponding molecular pathways (Monroe et al. 2021). Our goal was to establish if the loss of  
75 mechanosensory entrainment in the two populations was consistent with it having a common genetic  
76 basis, or whether it occurred independently in each population. We also sought to determine if genetic  
77 control of this phenotype is likely controlled by a single locus of major effect or whether multiple loci  
78 play discernible roles. Finally, we aimed to identify genes likely to be responsible for impacting the  
79 trait.

80

## RESULTS

### 81 **Loss of sensitivity to mechanical entrainment is a genetically determined trait that evolved** 82 **independently in two *Clunio* populations**

83 Circalunar clock robustly regulates the emergence of *Clunio* adults over a lunar month. We study this  
84 phenomenon under laboratory conditions by counting the number of emerged adults per day over  
85 several lunar cycles, and then assess characteristics of the phenotype using circular statistics: phase,  
86 period, rhythmicity, etc. The sensitivity of different strains to the zeitgebers is therefore estimated  
87 indirectly via the strength of their emergence rhythms upon entrainment to moonlight or tidal  
88 turbulence. Here we tested the entrainment of Plou-2NM, Ros-2NM, Lou-2NM, Bria-1SL, and Por-  
89 1SL under tidal turbulence for the first time, while the entrainment to moonlight (Kaiser 2014; Kaiser  
90 et al. 2016; Kaiser et al. 2021) and tidal turbulence (Neumann and Heimbach 1978) were previously  
91 reported for the other populations (Figure 1 A, Supplemental Figure 1, Supplemental Tables 1 and 2).

92 Vigo-2NM is the most southern strain and it is sensitive to tidal turbulence. Going north, we come  
93 across Jean-2NM which is insensitive to tidal turbulence, followed by five closely related populations  
94 at the coast of Bretagne: Plou-2NM, Ros-2FM, Ros-2NM, Lou-2NM, Bria-1SL, Por-1SL; and finally,  
95 the two most northern populations: He-1SL in Germany and Ber-1SL in Norway (Figure 1 A).

96 Bretagne populations vary from very sensitive in the north (Por-1SL and Bria-1SL), and less sensitive  
97 in the south (Ros-2NM, Lou-2NM, and Plou-2NM) to completely insensitive (Ros-2FM) (Figure 1 A,  
98 Supplemental Figure 1, Supplemental Table 2). This suggests that the frequency of the “insensitive  
99 allele” may vary among the Bretagne populations, giving rise to varying degrees of sensitivity.

100 Furthermore, as Ros-2FM and Jean-2NM are arrhythmic under tidal turbulence but rhythmic under  
101 moonlight (Figure 1 B and Supplemental Figure 1 O, S) (Neumann and Heimbach 1978), we can  
102 conclude that their lunar clocks are intact, but sensory inputs have evolved rendering them insensitive  
103 to one of the cues. To characterize the genetic basis for this phenotypic loss, we crossed turbulence-  
104 insensitive strains to a strain sensitive to both tidal turbulence and moonlight, Por-1SL (Figure 1 B,  
105 Supplemental Figure 1 F, G), and analyzed the emergence of adults in F1 and F2 generations (Figure  
106 1 B, C and Supplemental Figure 2). We used vector length of the summary circular statistics for

107 estimating the strength of the entrainment and found that sensitivity to tidal turbulence is genetically  
 108 determined and a dominant trait (Supplemental Table 2).

109 To test if the same mutations are responsible for the loss of sensitivity in Jean-2NM and Ros-2FM we  
 110 performed a complementation cross. Interestingly, the four F1 families raised separately all regained  
 111 their sensitivity to mechanical entrainment (Figure 1 C). This finding strongly suggests a different and  
 112 recessive genetic basis for the loss of trait in Jean-2NM and Ros-2FM.

113

114

115

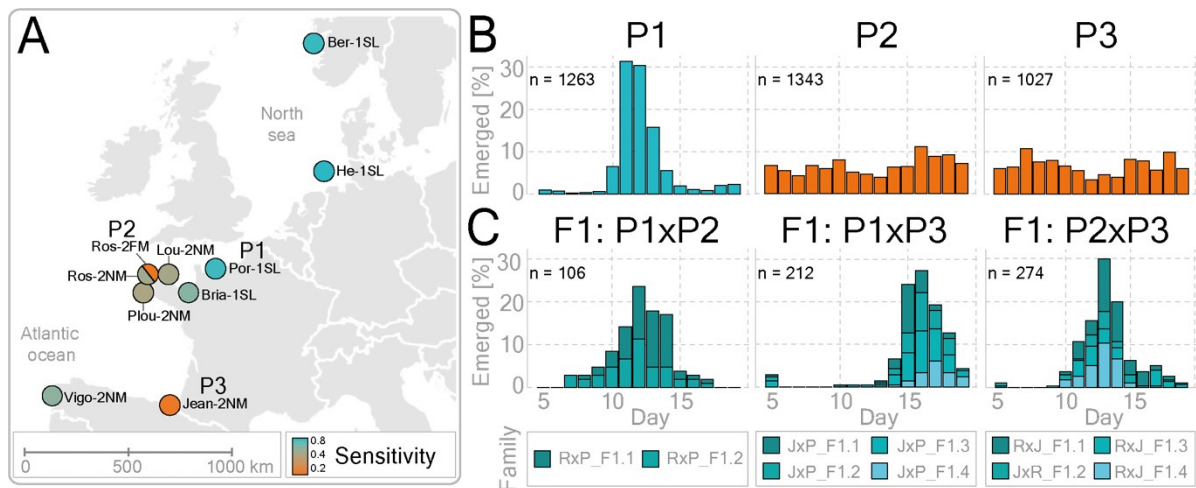

Figure 1

116

117

118 **Figure 1. Sensitivity to mechanical entrainment was lost twice independently in European *Clunio* populations.**

119 (A) The origin of the ten *Clunio* populations used in this study is shown on the map (Supplemental Figure 1). Heatmap depicts  
 120 the sensitivity of each strain to mechanical entrainment as estimated by the circular statistics (Supplemental Table 2). (B, C)  
 121 Graphs show the fraction of emerged individuals per lunar day upon mechanosensory entrainment. The total number of  
 122 emerged individuals is depicted in the left corner of each bar graph. (B) Graphs depict the emergence patterns of the parental  
 123 populations: P1 (Por-1SL), P2 (Ros-2FM), and P3 (Jean-2NM). P2 and P3 populations are insensitive to tidal turbulence as  
 124 shown by the arhythmic emergence patterns, while the P1 population is sensitive. Geographical locations and the years when  
 125 strains were established are given in Supplemental Table 1. (C) Crossing sensitive (P1) and insensitive (P2 or P3) strains  
 126 resulted in the sensitive F1 progeny (left and middle). Furthermore, when the two insensitive strains were crossed, the resulting  
 127 F1 hybrids regained sensitivity to the entrainment (right). The total number of individuals per generation is listed in  
 128 Supplemental Table 3.

## 129 **Discovering genomic loci responsible for the phenotypic loss in the Ros-2FM population**

130 Quantitative trait loci (QTL) mapping was conducted to locate the regions of the genome containing  
131 genetic variants responsible for the loss of sensitivity to tidal turbulence in the Ros-2FM population.  
132 The resolution of QTL mapping depends on the number and distribution of markers as well as the  
133 recombination events which in turn depends on the number of individuals in the crossing family. To  
134 maximize our chances of achieving narrow confidence intervals, we performed a large number of  
135 crosses and then selected two families for the analysis: F2 progeny of Ros-2FMxPor-1SL cross (RxP-  
136 F2.1) and a backcross progeny of Ros-2FMxPor-1SL F1 female to Ros-2FM male (RxP-BC.1)  
137 (Supplemental Table 3). The number of informative markers was 137 in RxP-F2.1 and 123 in RxP-  
138 BC.1. The total number of recombination events was 269 and 61, while the number of unique genomic  
139 positions of the recombination events was 51 and 36 in RxP-F2.1 and RxP-BC.1 families respectively  
140 (Figure 2 B and D).

141 If ~130 markers and ~40 unique recombination events would be evenly distributed along the 80Mb  
142 genome, we could achieve the mapping resolution of ~2-3Mb. However, several non-recombining  
143 regions were found in both families and one in which the marker order was inverted as compared to the  
144 reference (Figure 2 B and D). These regions are thought to be large polymorphic inversions (Michailova  
145 1980) which are limiting mapping resolution on the first chromosome and in the right arm of the second  
146 chromosome (manuscript submitted, Briševac et al. 2022).

147 In order to phenotype F2 and BC progenies, we must distinguish between “sensitive” individuals that  
148 emerged within the Por-1SL-like peak and “insensitive” individuals that can emerge on any lunar day.  
149 However, the emergence peak does not only contain sensitive individuals, but also some of the  
150 insensitive individuals. To overcome this issue, we tested different phenotyping strategies and mapping  
151 algorithms (Supplemental Figures 3-8) (see methods QTL section for more details). We calculated the  
152 probability of finding sensitive and insensitive individuals on each lunar day (Supplemental Figures 3  
153 and 4) and used it as a phenotypic score for the QTL analysis. In addition, we generated a reduced  
154 dataset by excluding the individuals with uncertain phenotypes and treated those with the probability  
155 of being „insensitive“ higher than 0.7 as „insensitive“ and lower than 0.3 as „sensitive“ (Supplemental



156 Figure 3). Finally, this approach allowed us to estimate relatively precisely the ratio of the two  
 157 phenotypes in the F2 and BC generations: 69:31 in the RxP-F2.1 intercross (Figure 2 C) and 50:50 in  
 158 the RxP-BC.1 backcross (Figure 2 A). The difference in ratios is attributed to a higher portion of  
 159 sensitive individuals (parental and F1 genotypes) in an F1x F1 intercross as compared to an F1xRos-  
 160 2FM backcross. Similar ratios were found in Jean-2NMxPor-1SL intercross families (see below). Such  
 161 segregation of parental phenotypes in F2 and BC progenies indicates that this trait is determined by a  
 162 small number of loci.  
 163

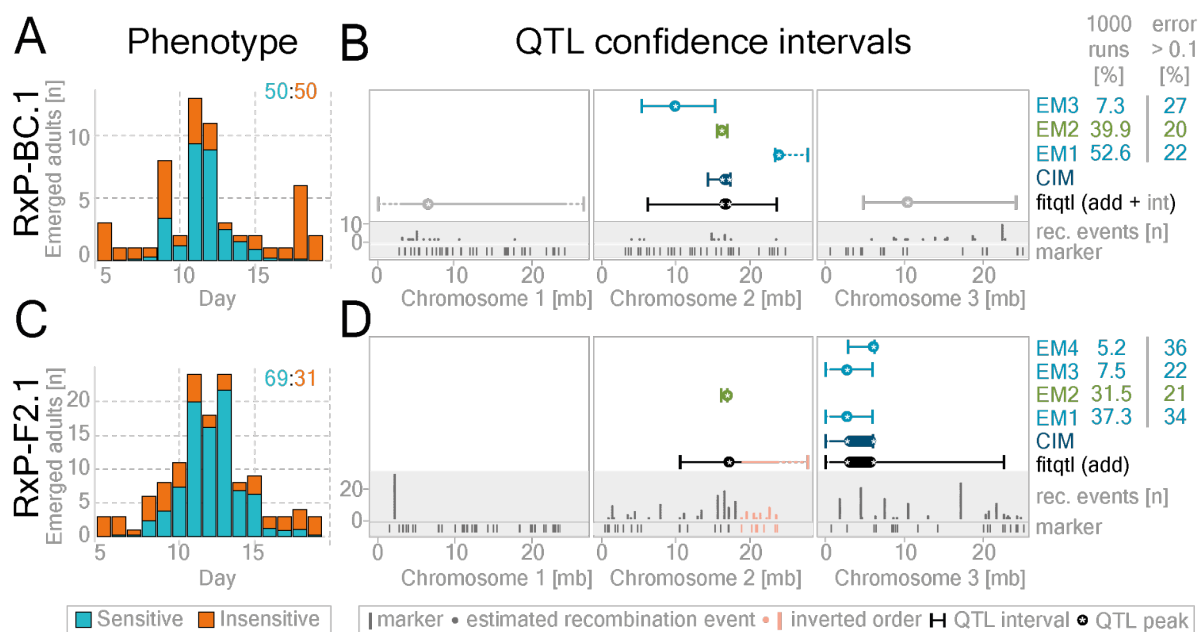

## Figure 2

164  
 165 **Figure 2. QTL mapping in two Ros-2FMxPor-1SL mapping families reveals one shared additive QTL on the second**  
 166 **chromosome**

167 Regions of the genome harboring genes responsible for the loss of mechanical entrainment in the Ros-2FM population were  
 168 identified in a [Ros-2FM x Por-1SL] x Ros-2FM backcross (RxP-BC.1) see panels A and B, and a [Por-1SL x Ros-2FM] F2  
 169 intercross (RxP-F2.1) see panels C and D. Bar graphs show the number of emerged individuals per day (A, C). The proportion  
 170 of insensitive (orange) and sensitive (blue) individuals found on each day was calculated based on estimated probabilities  
 171 (Supplemental Figures 3 and 4). The ratio of sensitive and insensitive individuals in each family is indicated in the top right  
 172 corner. (B, D) QTL confidence intervals are given for: composite interval mapping – dark blue, fitqtl: additive loci – black,  
 173 fitqtl: epistatic loci – gray, EM-algorithm – light blue. The green marks the phenotypic panel with the highest convergence in  
 174 EM analysis (i.e. the number of times the panel was found to be the best in 1000 runs) and the lowest error (i.e. the fraction of  
 175 individuals in each panel for which the binary phenotype differs significantly from the starting probabilities; see methods QTL  
 176 mapping/EM-pipeline, Supplemental Table 4).

177 Furthermore, in order to screen for additive QTLs, we ran standard interval mapping with *scanone*  
178 (Supplemental Figure 6 E-H) and composite interval mapping (Figure 2 B and D, Supplemental Figure  
179 6 I-L). To investigate QTLs in epistasis we ran a two-dimensional scan with *scantwo* function  
180 (Supplemental Figure 7). QTLs identified with *scanone* and *scantwo* were then fed into the multiple-  
181 QTL-mapping pipeline implemented in the R/qtl package with the *fitqtl* function (Figure 2 B and D ,  
182 Supplemental Figure 6 Q-T and 7). Since various models can be significant with *fitqtl*, we also tested a  
183 Bayesian method implemented in R package *qtlbim* designed to find the best QTL model for *fitqtl*  
184 (Supplemental Figure 6 Y-AB).

185 Multiple QTL mapping pipeline revealed one additive QTL and two QTLs in epistasis in the RxP-BC.1  
186 family, and two additive QTLs in the RxP-F2.1 family (Figure 2 B and D, Supplemental Figures 6-8).  
187 The additive QTL on the second chromosome was found in both crossing families. The QTL on the  
188 third chromosome interacts additively with the QTL on the second chromosome in the RxP-F2.1  
189 reduced dataset (Supplemental Figure 7 E-F), while in the RxP-BC.1 family it is in a negative additive-  
190 by-additive epistatic interaction (Cockerham 1954) with the QTL on the first chromosome: the QTL on  
191 the first chromosome has a positive additive effect in the heterozygous AB background of the QTL on  
192 the third chromosome and vice-versa (Figure 2 D, Supplemental Figure 7 A-D). The QTLs in epistasis  
193 were found only in one of the families, potentially because the presence of the epistatic interaction  
194 depends on the genetic background. This can occur if the mutations underlying QTLs in epistasis are  
195 not fixed in the two populations. In other words, if a mutation underlying QTL1 only has an effect in  
196 the presence of another mutation underlying QTL2, and one of the two alleles is absent in the parent of  
197 that crossing family, the epistatic interaction would not be identified. Thus, to find the regions of the  
198 genome containing the loci most likely pervasive in the natural populations, we further focused only on  
199 the additive QTLs.

200 In order to further estimate the effect of the phenotyping uncertainty on additive QTLs, we generated  
201 the *scanone*-optimized expectation-maximization pipeline (see methods for more details, Figure2, and  
202 Supplemental Figures 3-8). In a nutshell, all individuals are assigned binary phenotypes (0 or 1)  
203 depending on their starting phenotype possibilities. Then the algorithm changes the phenotypes of

204 individuals in order to find the binary phenotype panel with the highest LOD score (Figure 2 C and D,  
205 Supplemental Figure 6 M-P, for more details see methods). The resulting binary phenotype panels are  
206 assessed for their credibility by how often the algorithm converges to a specific panel (% convergence)  
207 and by which fraction of animals differs by more than 0.1 to the starting probability. In the RxP-BC.1  
208 family, the QTL interval of the EM binary panel with the lowest percentage of individuals with  
209 error>0.1 (20%) and the second-highest percentage of convergence (39.9%) perfectly overlaps with the  
210 QTL interval provided by CIM, and *fitqtl* mapping on probability phenotypes (Figure 2 B, Supplemental  
211 Figure 8 A-B). In the RxP-F2.1 family, the best panel according to the same criteria is also on the second  
212 chromosome: the percentage of convergence is 31.5, percentage of individuals with error > 0.1 is 21%  
213 (Figure 2 D and K, Supplemental Figure 8 C-D). The high level of convergence in the phenotype panels  
214 shows that the QTL landscape does not contain too many potential local optima. This suggests that the  
215 phenotyping uncertainty is limited.

216 Other than the phenotyping uncertainty, a polygenic or oligogenic origin could also lead to a reduction  
217 in the QTL LOD scores. In the RxP-BC.1 family, the full *fitqtl* model explains 28% of the phenotypic  
218 variance (Supplemental Figures 6-8 and Supplemental Tables 4). In the reduced (binary) dataset that  
219 number increases to 40.79% (Supplemental Figures 6-8 and Supplemental Tables 4). The QTL on the  
220 second chromosome alone explains 9.27% and the epistatic interaction between the first and the third  
221 chromosome explains 11.09%; while in the reduced dataset that becomes 2.82% and 11.68%  
222 respectively. In the RxP-F2.1 family, the *fitqtl* model explains 13.74% in the full and 21.8% in the  
223 reduced dataset. The percentage of variance explained by the QTL on the second chromosome is 5.9%  
224 and the third 8% (18.29% and 16.56% respectively in the reduced dataset). Previous QTL analysis on  
225 mapping the lunar phase, a phenotype of discrete nature, identified two QTLs: one explains 23% of the  
226 variation and the other 14% (Kaiser and Heckel 2012). In both the present and the previous study, we  
227 find a small number of significant loci impacting a trait, with a comparable proportion of phenotypic  
228 variance explained. This potentially indicates that we did not lose significant mapping power due to the  
229 non-discrete nature of the phenotype in the current study. Furthermore, this implies that if a small

230 number of loci collectively accounts for up to 20-40% of the phenotypic variance, the unidentified loci  
231 or loci of small effect size may still play a substantial role.

232 Finally, although the multiple QTL mapping is crucial for investigating the most likely number of QTLs,  
233 it tends to overestimate the QTL confidence intervals. Thus, to investigate the genes underlying the  
234 additive QTLs we relied on composite interval mapping conducted in 10cM windows (dark blue in  
235 Figures 2 B and D and Figure 3 A) while being informed by the QTL intervals resulting from the best  
236 binary phenotypic panels found by the EM algorithm (light green in Figure 2 B and D and Figure 3A).

### 237 **Whole-genome sequencing reveals genetic variants associated with insensitivity to tidal** 238 **turbulence in Ros-2FM**

239 As discussed above, the resolution of the QTL mapping in our model system can theoretically go down  
240 to 2-3Mb which can still harbor several hundred genes. Therefore, in order to further identify specific  
241 genomic loci underlying QTL regions, we combined QTL mapping with genome-wide association  
242 analysis (Figure 3 A and B). We sequenced 20-24 field-caught males from nine *Clunio* populations  
243 differentially sensitive to tidal turbulence (Supplemental Tables 1, 2, and 5, Figure 1A, Supplemental  
244 Figure 1) and called 746,887 SNPs and small indels. We used circular summary statistics (vector length)  
245 as the population-wide phenotypic score for sensitivity to tidal turbulence (Figure 3 B, Supplemental  
246 Table 2). We then applied the bayesian tool BayPass for calculating the strength of association of each  
247 of the variants to the insensitivity score while using a kinship matrix to correct for population structure  
248 (Supplemental Figure 9). Out of 746,887 variants, 357 were significantly associated with sensitivity to  
249 tidal turbulence. These variants affect 178 genes, as determined by SNPeff (Supplemental Table 6,  
250 Supplemental Figures 9-10). Most of the variants are located in non-coding regions and only a handful  
251 have potentially disruptive impacts on the neighboring genes (Supplemental Figure 9 C-D).

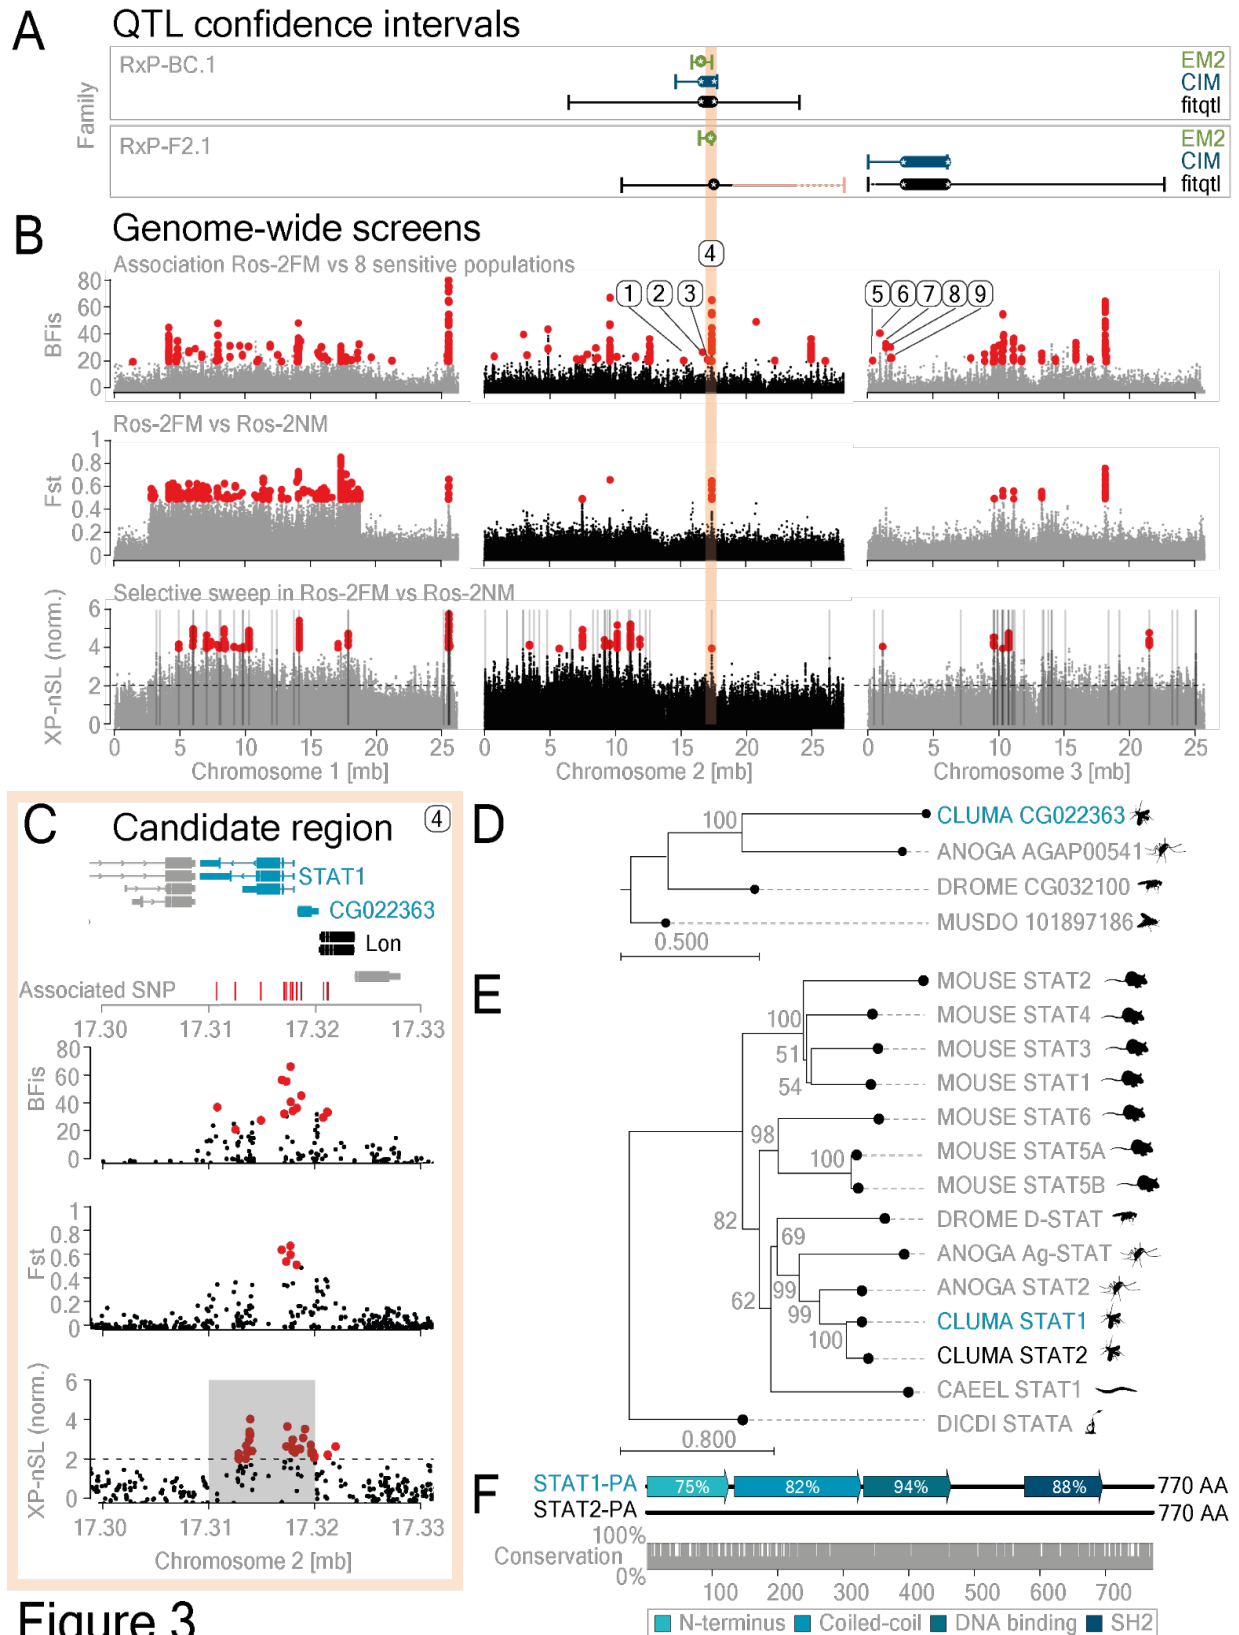

Figure 3

252  
253

254 **Figure 3. A combination of QTL mapping and genome-wide screens points to *STAT-1* and gravitaxis gene *CG022363***  
255 **as likely contributing to the loss of sensitivity to mechanical entrainment in the Ros-2FM population.**  
256 (A) QTL confidence intervals from the two mapping families are plotted along the three chromosomes (modified from Figures  
257 2 B and D). (B-top). The 746.887 variants called from Ros-2FM and eight differentially sensitive populations were screened  
258 for their association with the sensitivity to mechanical entrainment using BayPass. Sensitivity to mechanical entrainment was  
259 estimated from emergence patterns using circular statistics (Supplemental Figure 10 A, Supplemental Table 3). Median vector  
260 length was used as the phenotypic score. The Bayesian factor (BFis) depicting the strength of the association is plotted for all  
261 the variants along the three chromosomes (gray and black). 375 significantly different variants, as determined by BFis  $\geq 20$ ,  
262 eBPis  $\geq 2$ , XtXst  $\geq 21.67$  are marked in red (see Methods section for details). (B-middle and bottom plots): To expose  
263 potentially adaptive genetic variants under positive selection as a result of local adaptation, we contrasted the turbulence-  
264 insensitive Ros-2FM population with the sympatric Ros-2NM population, determined to be sensitive to this entrainment  
265 (Supplemental Figures 1 and 10A). (B-middle). Genetic differentiation ( $F_{ST}$ ) was plotted for the variants found in Ros-2FM  
266 and Ros-2NM populations. Red marks  $F_{ST}$  values above 0.5. (B-bottom). The cross-population nSL (number of segregating  
267 sites by length) statistic shows the decay of haplotype homozygosity surrounding adaptive alleles as a result of a selective  
268 sweep in Ros-2FM in contrast to Ros-2NM. The top 1% clusters of at least 10 variants with XP-nSL values above 2 in a 10kb  
269 window were called significant (highlighted in gray). (C) The region of the genome under the prevalent additive QTL on the  
270 second chromosome that also contains the most associated variants with the highest association scores, strong  $F_{ST}$  signal, and  
271 a significant signature of a partial sweep, harbors the *STAT-1* and *CG022363* genes (shown in red shaded area). The position  
272 of the associated variants is shown in red, the candidate gene in blue, and two neighboring genes in gray. For the depiction of  
273 all genes affected by associated mutations under the two QTLs see Supplemental Figures 10-12. (D, E) The phylogenetic  
274 trees of the *STAT* and *CG022363* gene families were shown for *Caenorhabditis elegans*, *Drosophila melanogaster*, *Musca*  
275 *domestica*, *Anopheles gambiae*, *Mus musculus*, *Clunio marinus* candidate gene (blue), and *Clunio marinus* ortholog of the  
276 candidate gene (black). (F) *C. marinus* has two *STAT* genes: CG012971 (*STAT-1*) and CG022905 (*STAT-2*). The alignment,  
277 conserved domains, and percentage of conservation between the two amino acid sequences are shown.

278 Crucially, the Ros-2NM population, which is sympatric to the insensitive Ros-2FM population, is  
279 sensitive to tidal turbulence (Supplemental Figure 1 and Supplemental Table 2). We can therefore ask  
280 if this phenotypic loss occurred as a result of a recent selective sweep due to local adaptation. To explore  
281 this, we first estimated genomic differentiation ( $F_{ST}$ ) between the two populations and found that the  
282 most prominent loci identified in the BayPass screen also have high  $F_{ST}$  values (Figure 3 B).  
283 Furthermore, if we assume that the causal genetic variant underwent positive selection as a result of a  
284 selective sweep, we can expect that it would leave a characteristic pattern of long high-frequency  
285 haplotypes and low genetic diversity in its vicinity (Szpiech and Hernandez 2016). The selective sweep  
286 occurring as a result of a local adaptation is calculated as the decay of haplotype homozygosity between  
287 the two populations (Szpiech and Hernandez 2016) and is implemented in cross-population statistic  
288 XPnSL (nSL: number of segregating sites by length) (Ferrer-Admetlla et al. 2014) in selscan 2.0  
289 (DeGiorgio and Szpiech 2021)(for details see Methods section). The top 1% of the 10kb regions  
290 containing a cluster of alleles with high XPnSL values were considered to be candidate regions under  
291 selection in Ros-2FM (Figure 3 B).

292 Finally, we combined the results from QTL analysis, the genome-wide association screen, and the  
293 selection screen. We identified the loci underlying additive QTLs (Supplemental Figure 10) and found  
294 the orthologues in model organisms of all the genes in the vicinity of the associated mutations  
295 (Supplemental Figures 11 and 12). When we zoomed into the genomic region underlying the shared  
296 additive QTL on the second chromosome (Figure 3 A) and looked for the variants with the highest  
297 association score as shown by BayPass,  $F_{ST}$ , and potentially a result of a selective sweep as shown by  
298 XP-nSL, (Figure 3 B) we uncovered a cluster of SNPs in one locus containing three genes: signal  
299 transducer and activator of transcription 1 (*STAT-1*), *CG022363*, and *Lon* (Figures 3 C). *CG022363* is  
300 an ortholog of the *Drosophila melanogaster* *CG32100* gene (Figures 3 D), which plays a role in  
301 gravitaxis (Armstrong et al. 2006) but is otherwise poorly investigated. The STAT protein family is  
302 conserved in most vertebrates and invertebrates (Figure 3E). *Chunio*, unlike *Drosophila melanogaster*,  
303 has two paralogues: *CG012971* (STAT-1) and *CG022905* (STAT-2). STAT-1 is most likely the  
304 ancestral STAT protein: ortholog of *Anopheles gambiae* STAT2 and *Mus musculus* STAT5a,5b, and

305 6; while STAT-2 is newly duplicated in *Clunio* (Figure 3 E). The two *Clunio* STAT proteins are 83%  
306 identical in amino-acid sequence (Figure 3 F). The most divergent protein domains in the two *Clunio*  
307 STAT proteins are the N-terminal domain, coiled-coil domain, and sh2 domain (Figure 3 F). Lon is a  
308 highly conserved protease (Supplemental Figure 11 F) which is crucial for mitochondrial homeostasis  
309 (Pinti et al. 2016).

310 As the QTL mapping explains at most 40% of the phenotypic variance, other loci of smaller effect must  
311 exist and are potentially picked up by the association analysis. We, therefore, explored all the genes  
312 identified by BayPass and SNPeff by conducting a gene ontology (GO) term enrichment analysis  
313 (Supplemental Figure 13). Out of 178 genes, 67 went into the GO analysis as they passed the criteria of  
314 having known orthologues, and 51 of those genes drove 78 significant GO terms (Supplemental Figure  
315 13). Interestingly, gravitaxis was one of the highest significant GO terms. This result, together with the  
316 previous identification of the gravitaxis gene *CG022905* under the prevalent QTL, prompted us to look  
317 more closely into the genes with known roles in gravitaxis (Supplemental Table 7). We found that out  
318 of 27 such genes in *Drosophila*, 6 are on our list of genes potentially associated with the loss of  
319 sensitivity to tidal turbulence (Supplemental Table 7).

### 320 **Complex genetic basis for the loss of sensitivity to tidal turbulence in Jean-2NM population**

321 As detailed above, complementation crosses between the two insensitive strains identified a separate  
322 origin for the insensitivity to tidal turbulence in Jean-2NM and Ros-2FM. To corroborate this finding,  
323 we further explored the genetic basis in the Jean-2NM population (Figure 4).

324 QTL mapping was conducted in two intercross families: in the JxP-F2.2 family we found one additive  
325 QTL on the first chromosome, while in the JxP-F2.1 family two additive QTLs on chromosomes 2 and  
326 3 appeared (Figure 4 A-D, Supplemental Figure 14-15, Supplemental Table 8). Interestingly, while the  
327 ratio of sensitive to insensitive individuals was consistently 73:27 in three independent intercross  
328 families including JxP-F2.1 (Supplemental Figure 16), the JxP-F2.2 family had a unique ratio of 62:38  
329 (Supplemental Figure 16). This could indicate that the genetic basis for the insensitivity in JxP-F2.2 is  
330 unique and may explain why we found different QTLs in JxP-F2.1 and JxP-F2.2. In addition, this



331 finding suggests that there is an oligogenic origin for the trait and that the alleles responsible for the  
332 loss of sensitivity are not fixed in the Jean-2NM population.

333 We then performed the same genetic screens in Jean-2NM as in Ros-2FM (Figure 4 E). The association  
334 analysis identified 173 SNPs significantly associated with the phenotypic loss in Jean-2NM as  
335 compared to the eight sensitive populations (Figure 4 E, Supplemental Table 9). As in the Ros-2FM  
336 association analysis, most associated SNPs are found in the non-coding regions of the genome  
337 (Supplement Figure 17). To investigate the potential selective sweep in Jean-2NM, we tried contrasting  
338 it with the closest turbulence-sensitive population we had: Vigo-2NM (Figure 4 E, Supplemental Figure  
339 1). However, since the two populations are geographically quite far from each other, the  $F_{ST}$  values  
340 were very high overall (Figure 4 E). Thus, Vigo-2NM is not the most suitable reference population for  
341 discovering reliable selective sweeps in Jean-2NM. Taken together, due to the complexity of the QTL  
342 mapping results in Jean-2NM, as well as the lack of prominent peaks in the association analysis, we  
343 were not able to identify candidate genes with enough precision. Nevertheless, the absence of a  
344 prominent QTL on chromosome 2 in Jean-2NM corroborates the finding that this phenotype was lost  
345 independently in Ros-2FM and Jean-2NM.

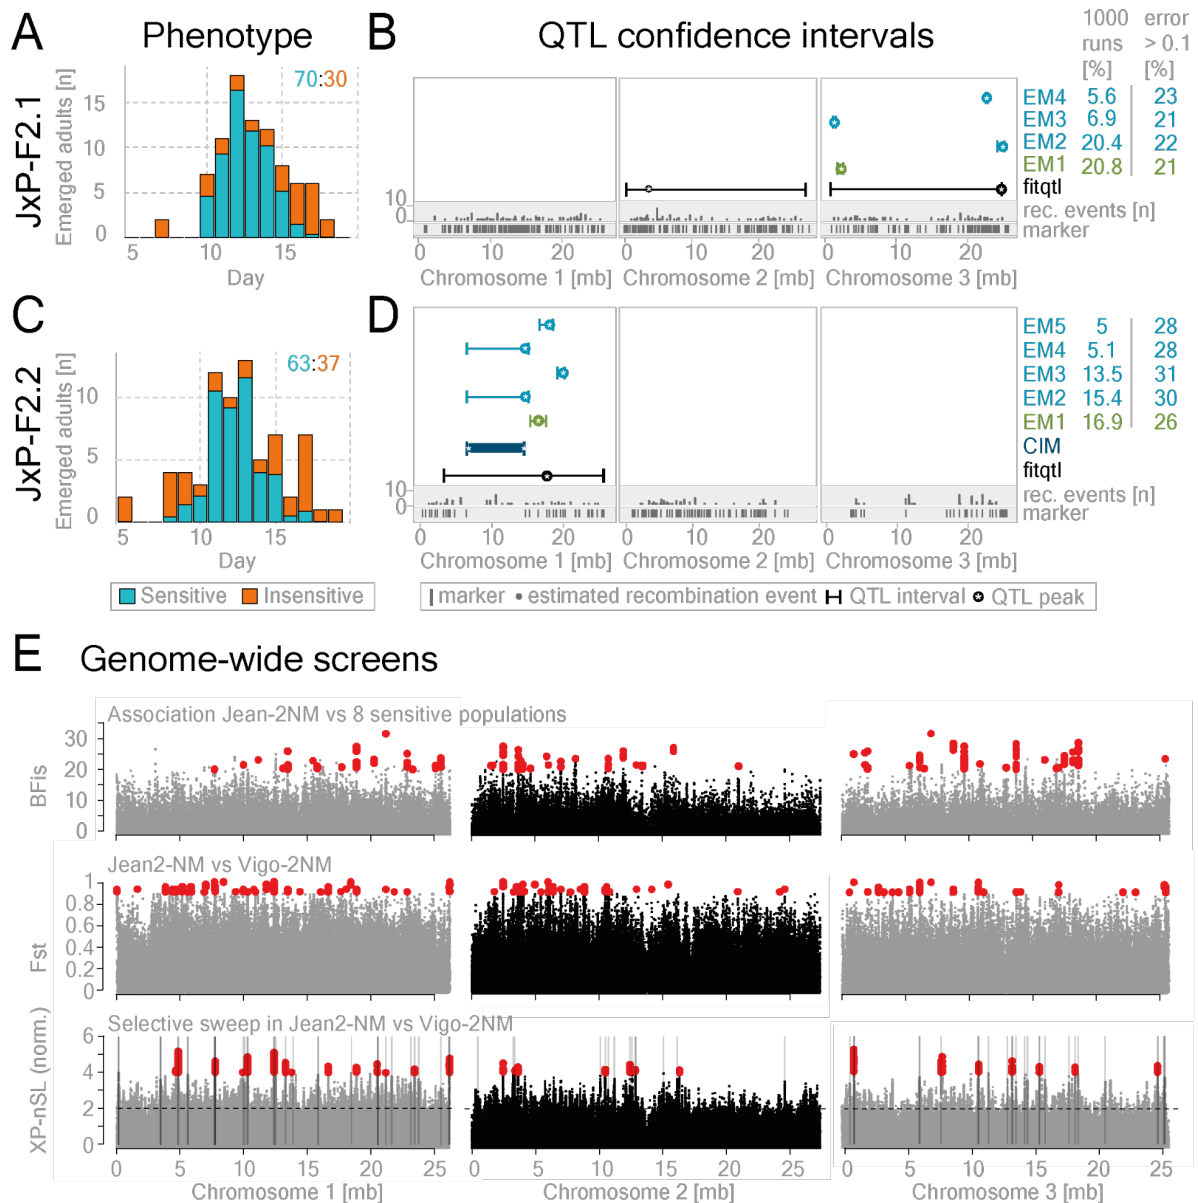

Figure 4

346

347

**Figure 4. The oligogenic basis for the loss of sensitivity to tidal turbulence in the Jean-2NM population.**

348

QTL mapping in two Jean-2NM x Por-1SL intercross families was performed to find genomic regions harboring genes

349

responsible for the loss of mechanical entrainment in Jean-2NM (A-D). (A, C) The proportion of insensitive (orange) and

350

sensitive (blue) individuals found on each day was calculated based on estimated probabilities (Supplemental Figure 14). The

351

ratio of the two phenotypes is indicated in the top right corner. (B, D) QTL confidence intervals are given for: composite

352

interval mapping – dark blue, fitqtl: additive loci – black, fitqtl: EM-algorithm – light blue. The green marks the phenotypic

353

panel with the highest convergence in EM analysis, and the lowest error (see methods QTL mapping/EM-pipeline,

354

Supplemental Table 8). (E) Association analysis was performed to find mutations associated with the loss of sensitivity to tidal

355

turbulence in the Jean-2NM population. (E-top): We screened for mutations associated with the loss of sensitivity to tidal

356

turbulence using 769,379 variants called from 210 individuals belonging to 9 differentially sensitive populations

357

(Supplemental Figures 1 and 17). Bayesian factor (BFis) is plotted for each variant along the three chromosomes. We found

358

173 significantly associated SNPs and indels (BFis > 20, eBPis > 2, XtXst > 20.02; see Methods section for details) marked

359

in red. The list of SNP effects and genes affected by them is given in Supplemental Table 9). (E-middle and bottom) To find

360

loci under selection in Jean-2NM that could be responsible for the loss of sensitivity, we contrasted it with the closest

361

turbulence-sensitive population Vigo-2NM. (E-middle) plots show the results of genomic differentiation analysis (Fst)

362

between Vigo-2NM and Jean-2NM. Red marks Fst values above 0.5. (E-bottom) Plots depict the results of the selective sweep

363

analysis in Jean-2NM as compared to the Vigo-2NM. The top 1% 10kb regions under selection are gray.

364

365

## DISCUSSION

### 366 **Loss of sensitivity to mechanosensory entrainment: result of convergent evolution?**

367 Loss-of-function alleles were once only associated with deleterious mutations, and loss of genes with  
368 the loss of redundant gene duplications. It is now understood that the loss of alleles and genes can drive  
369 adaptive phenotypic diversity (Monroe et al. 2021; Albalat and Cañestro 2016). Furthermore, in contrast  
370 to the early evolutionary theories, we now come to understand that convergent evolution is more of a  
371 rule than an exception. A few recent studies show that the loss of traits can appear as a result of  
372 convergent evolution: repeated eye loss in Mexican cavefish (Sifuentes-Romero et al. 2020) and the  
373 loss of flight in paleognathous birds (Sackton et al. 2019).

374 *Clunio* colonized the European Atlantic coast from south to north following the last ice age about 10.000  
375 to 20.000 years ago (Kaiser et al. 2010). Vigo-2NM is the most southern population tested in the  
376 laboratory and it is sensitive to tidal turbulence (Figure 1 A, Supplemental Figure 1 U). This hints that  
377 the ancestral *Clunio* population was likely also sensitive, and the insensitivity in certain populations can  
378 be considered a loss of trait. The adaptive value of this loss remains speculative (see below). However,  
379 we now know that it has evolved independently in the two *Clunio* populations. The obvious difference  
380 in Ros-2FM and Jean-2NM in identified QTLs (Figures 2 and 4 A-D) and the positions of the associated  
381 SNPs (Figures 3 and 4 E), corroborates the results from the complementation cross (Figure 1 C) and  
382 leads to the strong conclusion that this trait indeed evolved independently in the two locations. Thus, if  
383 this phenotype has adaptive value, we have here uncovered an example of recent convergent evolution  
384 in the process of local adaptation to different timing habitats.

### 385 **Evolution of differential sensitivity to circalunar synchronizers**

386 In agreement with Neumann (Neumann and Heimbach 1978), the northern populations (Por-1SL, Bria-  
387 1SL, He-1SL, and Ber-1SL) are very sensitive to tidal cues while southern ones are less sensitive or  
388 entirely insensitive (Jean-2NM, Plou-2NM, Ros-2NM, Ros-2FM, and Lou-2NM). He argued that  
389 moonlight is an ill-suited zeitgeber in the north due to the low position of the moon on the horizon  
390 (Neumann and Heimbach 1978). However, that does not explain why tidal turbulence would be

391 unreliable in the south. There is no obvious advantage for Ros-2FM or Jean-2NM to lose the sensitivity  
392 to this cue since the tides are as strong and predictable in those locations as in any other tested location.  
393 We also observed that populations most sensitive to the tidal turbulence have a semi-lunar period in  
394 adult emergence, i.e. they emerge twice a lunar month, while less sensitive populations have a lunar  
395 period (except Vigo-2NM). Tidal turbulence is a semi-lunar zeitgeber as it comes from the tides, and it  
396 could therefore be a more appropriate cue for the populations emerging twice a month in contrast to  
397 those that are emerging once a month for which moonlight, as a monthly zeitgeber, might be a more  
398 suitable cue.

399 Furthermore, we discovered that the two sympatric populations in Roscoff are differentially sensitive:  
400 Ros-2NM, sensitive to tidal turbulence, and Ros-2FM, insensitive to tidal turbulence (Supplemental  
401 Figure 1, M and O). Although we tested the two zeitgebers moonlight and tidal turbulence separately  
402 in the lab, they are perceived together in the wild. Furthermore, as the timing of the tides changes along  
403 the Atlantic coast, their phase-relationship varies in different habitats (Kaiser et al. 2011). Thus, if the  
404 two zeitgebers set the phase differently, losing sensitivity to one of them can be an evolutionary strategy  
405 to set the phase according to the most informative zeitgeber. In line with that, we find the same QTL  
406 locus harboring STAT-1 and CG022363 as one of the QTLs responsible for the phase-difference  
407 between Ros-2FM and Ros-2NM (manuscript submitted, Briševac et al. 2022).

#### 408 **Genes responsible for the loss of sensitivity to tidal turbulence in Ros-2FM**

409 Tidal turbulence is a vibration, perceived by the mechanosensory nervous system, and mechanosensory  
410 pathways are even in model organisms still largely unknown. Most molecular players were identified  
411 in genetic screens on phenotypes associated with defects in mechanosensory systems in *Drosophila*  
412 *melanogaster*, *Caenorhabditis elegans*, and *Mus musculus* (Ernstrom and Chalfie 2002). Genes found  
413 in these analyses are not only directly involved in mechanosensation: ion channels, tethering of the ion  
414 channels, extracellular matrix, cytoskeleton; but also indirectly in the development of the sensory organs  
415 or the function and development of the cells downstream in the neuronal circuits (Ernstrom and Chalfie  
416 2002). Many complex phenotypes are polygenic in origin, which makes simple gene–function

417 relationships hard to infer. Additionally, mutations in regulatory regions, rather than mutations in  
418 coding regions, are found to shape most emerging phenotypes (Sackton et al. 2019). Similarly, the loss  
419 of complex phenotypes has been shown to be driven by divergence in cis-modulatory elements of  
420 developmental genes in the loss of limbs in snakes and degeneration of eyes in subterranean mammals  
421 (Roscito et al. 2018). Therefore, we investigated both, the region of the genome with the highest  
422 association score (Figure 3 C), but also other potential candidate genes (Supplemental Figures 10-13,  
423 Supplemental Tables 6-7).

#### 424 *STAT-1 locus*

425 Signal Transducer and Activator of Transcription (STAT) protein is a part of the evolutionary conserved  
426 JAK-STAT pathway that controls developmental decisions and participates in the immune response  
427 (Wang and Levy 2012). Archetypical members of each of the components were present at the time of  
428 the emergence of Bilateria: JAK, STAT, SHP, and the three SOCS proteins (Liongue and Ward 2013).  
429 STAT proteins were duplicated many times throughout metazoan evolution, and while some  
430 pseudogenized, many evolved into novel genes through rapid sequence diversification and  
431 neofunctionalization (Wang and Levy 2012). Insect STATs form a single clade in phylogenetic analyses  
432 and constitute an ancient class of STATs together with mammalian STAT5 and 6 (Wang and Levy  
433 2012). While most insect species like *Drosophila melanogaster* and *Apis mellifera* have a single STAT  
434 whose function remains conserved (Wang and Levy 2012), in others like *Anopheles gambiae* STAT  
435 duplicated and the new gene acquired diverse functions. Duplicated *Anopheles* STAT has a role in  
436 defense against bacteria (Barillas-Mury et al. 1999), *Plasmodium* infection (Gupta et al. 2009), and  
437 innate immunity (Souza-Neto et al. 2009). In addition, duplicated STAT acts as an upstream regulator  
438 of the evolutionarily conserved STAT protein (Gupta et al. 2009).

439 In contrast, in vertebrates, all components of the JAK-STAT pathway duplicated several times and  
440 STAT proteins attained specialized functions in various cells. Interestingly, the expression of the TrpA1  
441 mechanosensitive channel is regulated via the JAK-STAT pathway in nociceptive neurons in mice  
442 (Malsch et al. 2014). Similarly, STAT3 is necessary for the differentiation and regeneration of inner ear  
443 hair cells, the basic mechanosensory receptors for hearing and balance in zebrafish (Liang et al. 2012).

444 Finally, the JAK-STAT pathway is directly coupled to the mechano-gated channels in various non-  
445 neuronal cells, regulating gene expression downstream of the channel activation (Lammerding et al.  
446 2004; Millward-Sadler et al. 2006; Shah et al. 2010; de Andrés et al. 2011; Busch-Dienstfertig and  
447 González-Rodríguez 2013; Kunnen et al. 2018).

448 *Clunio marinus* has two STAT proteins: CG012971 (STAT-1), the ortholog of *Anopheles gambiae*  
449 STAT2, and *Mouse* STAT5a,5b and 6; and CG022905 (STAT-2) which based on phylogenetic analysis  
450 appears to be a novel *Clunio* duplication (Figure 3 D). Two *Clunio* STATs are 83% identical in amino-  
451 acid sequence (Figure 3 E), while *Anopheles* STATs are almost identical in protein length but share  
452 only 47% overall sequence identity (Wang and Levy 2012). Two *Clunio* STATs differ the most in the  
453 N-terminal domain which has a role in nuclear translocation and protein-protein interactions, and the  
454 coiled domain which is involved in nuclear export and regulation of tyrosine phosphorylation (Liongue  
455 and Ward 2013). This indicates that the two STATs could be regulated differently or be a part of  
456 different signalling pathways by interacting with different proteins and thus obtaining different roles.

457 Taken together, we can speculate that *Clunio* STAT-1 has a role in the perception of tidal turbulence  
458 by being involved in the development or differentiation of mechanosensory organs, or mechanosensory  
459 receptors appropriated this JAK-STAT pathway for regulation of gene expression. Further functional  
460 analysis is necessary to test this hypothesis. If proven, this would be the first evidence of a STAT role  
461 in mechanosensation in invertebrates.

#### 462 *Gravitaxis: potential role of chordotonal organs*

463 CG022363 also falls into the region with the highest SNP density together with STAT-1 (Figure 3 C).  
464 This gene is an ortholog of the *Drosophila* CG32100 gene, which has a role in gravitaxis although the  
465 exact molecular function of this gene remains unknown (Armstrong et al. 2006). Gravitaxis is a  
466 function of the mechanosensory system, and as is the case with all mechanosensory functions, it is  
467 poorly understood on a molecular level. To this day, most of the molecular machinery was identified  
468 through genetic screens of behaviors associated with impaired gravitaxis (Armstrong et al. 2006). As a  
469 result, 27 genes were associated with gravity-sensing in *Drosophila*: some in detecting gravity directly:

470 *inactive, nanchung, painless, and pyrexia* (Sun et al. 2009); but the majority seem to have an indirect  
471 role most likely in the development of the sensory organs: *alan shepard, escargot, broad, cryptochrome,*  
472 *nemo* and others (Sun et al. 2009; Armstrong et al. 2006). Strikingly, out of those 27 genes, we found 6  
473 that were associated with loss of sensitivity to tidal turbulence in Ros-2FM (Supplemental Table 7):  
474 *shep, snaill1\_CG000103, broad, cry1, nmo,* and the above-mentioned *CG022363*. In line with that,  
475 gravitaxis was found as one of the top GO terms (Supplemental Figure 13). Three of the six belong to  
476 the 15 candidate genes under the QTL regions: *shep, snaill1\_CG000103,* and *CG022363* (Supplemental  
477 Figure 10). In *Drosophila shep* is involved in neuronal development and remodeling of the sensory  
478 neurons (Chen et al. 2014; Olesnicky et al. 2018) and *escargot* has a role in neurogenesis (Ashraf et al.  
479 1999). Therefore, it is likely that they are indirectly involved in gravitaxis in *Drosophila* by contributing  
480 to the development of the sensory organs responsible for detecting gravity. *Drosophila* larvae detect  
481 both vibration and gravity via chordotonal organs (Kamikouchi et al. 2009; Ishikawa et al. 2020). In  
482 addition, chordotonal organs are necessary for the mechanosensory entrainment of the circadian clock  
483 in *Drosophila* adults (Simoni et al. 2014). Taken together, it is possible that chordotonal organs are  
484 responsible for mechanosensory entrainment of the circalunar clock in *Clunio* as well. Mutations in  
485 genes responsible for the development of the chordotonal organs could lead to impaired gravity sensing  
486 as well as detection of vibration and thus impair mechanosensory entrainment of the circalunar clock  
487 in Ros-2FM.

488 Here we show for the first time a convergent loss of sensitivity to tidal turbulence in two *Clunio*  
489 populations. We found several loci to be responsible for this loss. A detailed analysis suggests that in  
490 one of the populations the JAK/STAT pathway and gravitaxis may play a prominent role in the  
491 detection of tidal turbulence. While in Baltic and Northern European populations complete lunar  
492 arrhythmicity seems to be a highly polygenic trait (Fuhrmann et al.), the selective loss of sensitivity to  
493 a zeitgeber seems to have a less complex, oligogenic basis. If in the future tools for molecular  
494 manipulation of *Clunio* are developed, this setting is a good starting point to identify novel genes and  
495 pathways involved in mechanosensation.

496

## METHODS

### 497 ***Clunio* cultures**

498 *C. marinus* cultures were established from different locations (Supplemental Table 1) and maintained  
499 in the laboratory according to Neumann (Neumann 1966). Around 1000 larvae were kept in 20x20x5  
500 cm plastic boxes with sand from the natural habitat and 15‰ seawater. They were fed twice a week  
501 with diatoms (*Phaeodactylum tricornutum*, strain UTEX 646). Nettle powder was added twice a month  
502 with each water exchange. *Clunio* larvae were raised under a 16h light and 8h darkness regime and a  
503 temperature of 18°C. In experiments with moonlight entrainment, the artificial moonlight was simulated  
504 with neutral white LED ~4000K light (Hera 610 014 911 01) on 4 consecutive nights every 30 days.  
505 The 24-hour period when moonlight was first applied was marked as day 1. In the experiments with  
506 mechanosensory entrainment, cycles of vibration were used to simulate tidal turbulence in a setup  
507 established by Neumann (Neumann 1978). Briefly, an electromotor generating vibration of 50 Hz,  
508 30dBa above background noise was attached to the shelves with *Clunio* cultures and controlled by a  
509 custom-made “tidal clock”. The clock kept the motor on for 6h 10 min and off for 6h 15min which gave  
510 a 12.4-hour tidal rhythm. The onset of vibration shifted every day by 50 min which resulted in a 14.7-  
511 day semi-lunar cycle. The day when vibration started in the middle of their subjective night was  
512 arbitrarily marked as day 1. Phenotypes were recorded by collecting emerged adults from three culture  
513 boxes per strain every day for at least 60 days or two lunar cycles.

### 514 **Crossing experiments**

515 To explore the genetic basis of insensitivity to tidal turbulence, we crossed the insensitive Ros-2FM or  
516 Jean-2NM strains with the sensitive Por-1SL strain, as well as the two insensitive strains with each  
517 other (Supplemental Table 3). Detailed description can be found in the Supplemental methods.

### 518 **QTL mapping**

519 QTL mapping was performed to identify genetic regions harboring genes where natural variants that  
520 underlie the loss of sensitivity to tidal turbulence are segregating. Two families from the Ros-2FM x  
521 Por-1SL cross were chosen for QTL mapping: Ros-2FMxPor-1SL-F2-24 in the further text referred to



522 as RxF-F2.1, and Ros-2FMxPor-1SL-BC-15 in the further text referred to as RxF-BC.1 (Supplemental  
523 Table 3). Similarly, two intercrosses of Jean-2NM x Por-1SL families were selected: Jean-2NMxPor-  
524 1SL-F2-8.6 and Jean-2NMxPor-1SL-F2-11.3 in the further text referred to as JxF-F2.1 and JxF-F2.2.

525 **Phenotyping** (Supplemental Figure 3): Emergence data was collected for parental, F1 and F2, and BC  
526 generations, and lunar emergence days under turbulence entrainment were assigned as described above  
527 (Script 1, Supplemental Table 2, Supplemental Figures 1 and 2). To resolve the problem of the  
528 overlapping “sensitive” and “insensitive” phenotypes emerging during the peak in the F2 and BC  
529 progeny, we designed a pipeline to calculate the probability of finding “sensitive” and “insensitive”  
530 individuals on each day. For more details see Supplemental Methods.

531 **Genotyping:** DNA was extracted from adults collected in crossing experiments with the salting-out  
532 method (Reineke et al. 1998), it was amplified using RepliG, and single-digest or double-digest RAD  
533 sequencing was performed (Etter et al. 2011; Etter and Johnson 2012; Baird et al. 2008). A detailed  
534 protocol can be found in the Supplemental methods. The script containing read processing, mapping,  
535 genotype calling and filtering for informative variants is given in the supplement as Script 2.

536 *Read processing and mapping:* For discriminating individuals, P1 and P2 adaptors contained unique  
537 barcode sequences (Supplemental Table 10). Raw reads were trimmed to remove adapters and low-  
538 quality bases with Trimmomatic v0.38 (Bolger et al. 2014). Trimmomatic parameters used for paired-  
539 end reads were ILLUMINACLIP:<PE\_adapter\_file>:2:30:10:2:true LEADING:20 TRAILING:20  
540 MINLEN:50 and for single-end reads ILLUMINACLIP:<SE\_adapter\_file>:2:30:10 LEADING:20  
541 TRAILING:20 MINLEN:50. For paired-end library RxF-F2.1, overlapping read pairs were assembled  
542 into single reads with PEAR v.0.9.10 (Zhang et al. 2014) using default parameters. Paired (PEAR  
543 unassembled) and single reads (PEAR assembled and unpaired reads from R1 or R2 after adapter  
544 trimming) were mapped independently with NextGenMap v0.5.5 (Sedlazeck et al. 2013) to the  
545 CLUMA2.0 reference genome (available at <https://doi.org/10.17617/3.42NMN2>; currently  
546 unpublished) with default parameters except for --min-identity 0.9 and --min-residues 0.9. Read groups  
547 were specified during mapping using --rg-id and --rg-sm. The independently mapped reads were then  
548 merged into a single file using samtools v1.9 (Li et al. 2009) merge, with parameters -u -c -p. For single-

549 end libraries, trimmed reads were directly mapped with NextGenMap with previously mentioned  
550 parameters. Mapped reads were sorted and indexed with samtools sort and samtools index respectively.

551 *Variant calling*: Single nucleotide polymorphisms (SNPs) and insertion-deletion (indel) genotypes were  
552 called using GATK v3.7-0-gcfedb67 (McKenna et al. 2010). Steps include initial genotype calling using  
553 GATK HaplotypeCaller with parameters --emitRefConfidence GVCF and -stand\_call\_conf 30, filtering  
554 of variants using GATK SelectVariants with '-select DP > 30.0', recalibration of base qualities using  
555 GATK BaseRecalibrator with '-knownSites', preparing recalibrated BAM files with GATK PrintReads  
556 using -BQSR and finally, recalling of genotypes using GATK HaplotypeCaller with previously  
557 mentioned parameters. Individual VCF files were combined into a single file using GATK  
558 GenotypeGVCFs.

559 *Informative variants and genotype matrix*: VCF files were filtered for minimum genotype quality  
560 (minGQ) 20, minor allele frequency (maf) 0.10, and maximum fraction of samples having missing  
561 genotypes (max-missing) 0.60. Genotypes were coded as 'AA', 'AB', or 'BB' based on the inferred  
562 inheritance pattern (Supplemental Table 11). To maximize the number of informative markers in a  
563 backcross, we included markers for which both parents were heterozygous or, the F1 parent was  
564 heterozygous and the Ros-2FM parent was homozygous (Supplemental Table 11. To infer from which  
565 parent the 'A' or 'B' allele comes from at ambiguous loci, we chose genotypes based on the consistency  
566 of the genotypes along the chromosome (i.e. the assignment that had a smaller number of genotype  
567 switches across the individuals in the BC progeny) (Supplemental Table 11, consistency genotype  
568 assignment in Script 2). Our final genotype matrix was manually inspected before importing it into  
569 R/qtl. Marker order and genotype errors were further investigated in R/qtl. One inversion was identified  
570 in the right arm of the second chromosome in the RxP-F2.1 family and the order of markers was inverted  
571 in that region. The final number of markers was 117 for RxP-BC.1 and 137 for the RxP-F2.1 family.  
572 The final genotype matrix is given in Supplemental Table 4.

573 Samples from parents' and F1s of the two Jean-2NMxPor-1SL families, unfortunately, had very few  
574 good genotypes. Thus, we designed an alternative approach for reconstructing the recombination  
575 matrix. For details see Supplemental Methods.

576 **QTL mapping:** Standard interval mapping and multiple QTL mapping were done with R/qtl package  
577 functions: *scanone*, *scantwo*, and *fitqtl* (Karl W. Broman and Saunak Sen 2009). QTL intervals were  
578 estimated with *bayesint* function. Composite interval mapping was analyzed in Windows QTL  
579 Cartographer Version 2.5\_011 (number of covariates 5, window 10 cM) (Wang et al. 2012). In addition,  
580 to confirm the model found by *fitqtl* multiple QTL mapping, we used the Bayesian QTL mapping R  
581 package “qtlbim” (Yandell et al. 2007). Function *qb.best* was used to identify the best model, and  
582 *qb.scanone* to compare additive and epistatic QTLs found by R/qtl.

583 *Expectation-maximization (EM) algorithm* (Supplemental Figure 5): To explore the effect of  
584 uncertainty in phenotyping on the QTL mapping results, we devised an EM algorithm to assign binary  
585 phenotypes to the entire dataset (Supplemental Figure 5). For details see Supplemental Methods. The  
586 script can be found in the supplement as Script 3.

#### 587 **Association analysis**

588 The complementation cross indicated that the genetic basis for the loss of sensitivity is different in the  
589 two populations (Figure 1). Therefore, the two insensitive populations were analyzed separately. To  
590 identify variants associated with the loss of sensitivity to tidal turbulence in Ros-2FM we performed a  
591 genome screen on 746,887 SNPs and small indels called in 210 males from nine populations  
592 differentially sensitive to tidal turbulence (Supplemental Table 5). Similarly, to find potentially  
593 causative mutations in Jean-2NM, we used a dataset of 769,379 SNPs and indels from 210 males from  
594 Jean-2NM and the same eight populations sensitive to tidal turbulence.

595 **Genotyping:** DNA from field-caught males stored in 100% ethanol was extracted using the salting-out  
596 method (Reineke et al. 1998). Genomic DNA was amplified with standard RepliG protocol (REPLI-g  
597 Mini Kit QIAGEN 150025). Whole genomes of 20-24 adults from nine populations were sequenced on  
598 Illumina HiSeq3000 with paired-end 150-bp reads (Supplemental Table 5).

599 *Read processing:* Reads from several sequencing runs were merged with the *cat* function. Adapters  
600 were trimmed using Trimmomatic tool (Bolger et al. 2014) and the following parameters:  
601 ILLUMINACLIP <Adapter file> :2:30:10:8:true, LEADING:20, TRAILING:20, MINLEN:75.

602 Overlapping read pairs were assembled using PEAR with the following parameters: -n 75 -c 20 -k  
603 (Zhang et al. 2014). Reads were mapped using bwa mem version 0.7.15-r1140 (Li and Durbin 2009)  
604 using the latest Cluma\_2.0 reference genome (available at <https://doi.org/10.17617/3.42NMN2>;  
605 currently unpublished; private url for viewing it during the review process:  
606 <https://edmond.mpdl.mpg.de/privateurl.xhtml?token=79417ae6-4696-4f31-b436-16cd358905f4>). The  
607 independently mapped reads were then merged into a single file, filtered for -q 20, and sorted using  
608 samtools v1.9 (Li et al. 2009).

609 *Variant calling:* SNPs and small indels were called using GATK v3.7-0-gcfedb67 (McKenna et al.  
610 2010). All reads in the q20 sorted file were assigned to a single new read-group with the  
611 ‘AddOrReplaceReadGroups’ script with LB=whatever PL=illumina PU=whatever parameters.  
612 Genotype calling was then performed with HaplotypeCaller and parameters --emitRefConfidence  
613 GVCF -stand\_call\_conf 30, recalibration of base qualities using GATK BaseRecalibrator with ‘-  
614 knownSites’. Preparing recalibrated BAM files with GATK PrintReads using -BQSR. Recalling of  
615 genotypes using GATK HaplotypeCaller with previously mentioned parameters. Individual VCF files  
616 were combined into a single file using GATK GenotypeGVCFs.

617 *BayPass genotype matrix:* The genotype matrix for BayPass association analysis (Gautier 2015) was  
618 generated by filtering for minor allele frequencies larger than 0.05, the maximal number of missing  
619 values per variant was set to 20%, the maximal number of alleles was 2, and minimal read quality minQ  
620 was set to 20 with VCFtools (0.1.14) (Danecek et al. 2011). Allele count per population was calculated  
621 using the VcfR package (Knaus and Grünwald 2017). Briefly, a previously filtered vcf table containing  
622 24 individuals from 9 populations was separated into vcf files containing individuals from distinct  
623 populations. Individual vcf files were read with read.vcfR function and allele frequency per population  
624 per site was calculated using the gt.to.popsum function. Population allele frequencies were then  
625 combined into a genotype matrix.

626 **Phenotyping:** Sensitivity to turbulence was estimated for each population using summary circular  
627 statistics (see methods section QTL mapping/Phenotyping). Vector length was used as a phenotypic  
628 score (Supplemental Table 2).

629 **BayPass:** BayPass was run with 3 random seeds (1, 1988, 11273), and the median of BFis, eBPis,  
630 XtXst, and  $-\log_{10}$  p-value of XtX was calculated. To find the correct significance threshold for XtX  
631 statistics, pseudo-observed data set (POD) was generated by sampling 100.000 SNPs with R function  
632 *simulate.baypass* and found that 1% of XtXst POD values was 21.67 in Ros-2FM dataset, and 20.02 in  
633 Jean-2NM. To subset highly associated variants in Ros-2FM, we filtered for BFis  $\geq 20$ , eBPis  $\geq 2$   
634 and XtXst  $\geq 21.67$  (Supplemental Figure 9 A) and BFis  $\geq 20$ , eBPis  $\geq 2$  and XtXst  $\geq 20.02$  in  
635 Jean-2NM (Supplemental Figure 17 C). Association analysis in BayPass is corrected for the population  
636 structure based on a kinship matrix  $\Omega$ .

### 637 **SNPeff**

638 SNP effects were analyzed in CLUMA2.0\_M, a version of the reference genome that contains manual  
639 curations to the reference sequence made during genome annotation (available at  
640 <https://doi.org/10.17617/3.42NMN2>; currently unpublished). SNPs were transferred from CLUMA2.0  
641 to CLUMA2.0\_M using a Python3 script (Script 4), which creates a map of positions from CLUMA2.0  
642 to CLUMA2.0\_M by accounting for insertions and deletions. As input, the script uses a GFF file with  
643 manual reference edits, exported from Web Apollo version 2.5.0 (Lee et al. 2013). With the  
644 CLUMA2.0\_M reference sequence, the location and putative effects of the SNPs and indels relative to  
645 CLUMA2.0\_M gene models were annotated using SnpEff 4.5 (build 2020-04-15 22:26, non-default  
646 parameter `'-ud 0'`) (Cingolani et al. 2012). The complete list with the number of variants with distinct  
647 effects is given in Supplemental Tables 6 and 9.

### 648 **Phylogenetic trees**

649 The identity of the 15 candidate genes was explored by the reciprocal blast between *Clunio* and  
650 *Drosophila melanogaster* protein sequences. eggNOG 5.0 database was then used to identify orthologs  
651 in other model organisms: *Anopheles gambiae*, *Mus musculus*, *Homo sapiens*, and *Caenorhabditis*  
652 *elegans* (Huerta-Cepas et al. 2019). The most distant protein sequence in eggNOG phylogenetic trees  
653 was taken as an outgroup sequence. Protein sequences were then aligned, and phylogenetic trees were

654 created in QIAGEN CLC Main Workbench version 7.9.3. Bootstrap values in 1000 runs were reported  
655 (Figure 3 D,E, Supplemental Figures 11 and 12).

### 656 **Selective sweep analysis**

657 To investigate if the associated loci evolved as a result of a recent selective sweep in the process of local  
658 adaptation, we calculated cross-population nSL (number of segregating sites by length) developed by  
659 (Szpiech et al. 2021). XP-nSL is designed to detect selective sweeps due to local adaptation within a  
660 query population by comparing its integrated haplotype homozygosity (iHH) with one of a reference  
661 population. Here, positive scores suggest long haplotypes in population A with respect to population B  
662 and a potential sweep in A, whereas negative scores suggest long haplotypes in B with respect to A.  
663 nSL, in contrast to EHH, was developed to accommodate the lack of genetic maps in favor of physical  
664 maps (Ferrer-Admetlla et al. 2014). We used selscan 2.0 as it was recently revised to work with  
665 unphased multi-locus genotypes (DeGiorgio and Szpiech 2021; Szpiech et al. 2021). Details can be  
666 found in the Supplemental Methods.

### 667 **Genetic differentiation (fst)**

668 To provide a bridge between the association analysis conducted on ten populations, and the cross-  
669 population selective sweep analysis calculated between the two populations (see Methods section on  
670 association analysis and selective sweeps), we estimated genetic differentiation between those two  
671 contrasted populations: Ros-2FM compared to Ros-2NM and Jean-2NM compared to Vigo-2NM. The  
672 same vcf files containing GATK-called SNPs and indels used for selective sweep analysis were used  
673 (see Methods section on selective sweeps). Genetic differentiation between the two populations (fst)  
674 was estimated using vcftools version 0.1.14 (Danecek et al. 2011) parameters --weir-fst-pop --fst-  
675 window-size 1 --fst-window-step 1.

### 676 **GO term enrichment**

677 To investigate if the genes identified by BayPass and SNPeff perform some of the known biological  
678 functions, we ran Gene Ontology (GO) term enrichment. We previously annotated 5,393 out of 15,193  
679 *C. marinus* genes with GO terms (Fuhrmann et al.). In our current reference genome CLUMA2.0, 5436

680 out of 13751 genes were annotated with GO terms. In brief, GO terms were annotated using the longest  
681 protein sequence per gene with mapper-2.0.1.(Huerta-Cepas et al. 2017) from the eggNOG 5.0 database  
682 (Huerta-Cepas et al. 2019), using DIAMOND (Buchfink et al. 2014), BLASTP e-value <1e-10, and  
683 subject-query alignment coverage of >60%. Only GO terms with “non-electronic” GO evidence from  
684 best-hit orthologs restricted to automatically adjusted per-query taxonomic scope were used. To assess  
685 the enrichment of “Biological Process” GO terms, the weight01 Fisher’s exact test was implemented in  
686 topGO (version 2.42.0, R version 4.0.3) (Alexa and Rahnenfuhrer 2022).

687

688

#### DATA ACCESS

689 Ros-2FM and Ros-2NM sequence reads are deposited at ENA under Accession PRJEB54033. Por-  
690 1SL, He-2SL and Ber-1SL raw sequence reads are deposited at ENA under Accession PRJEB43766.  
691 Jean-2NM, Vigo-1NM, Plou-2NM, Lou-2NM, Bria-1SL raw sequence reads are deposited at ENA  
692 under Accession PRJEB55328. RAD-seq reads for QTL mapping are deposited at ENA under  
693 Accession PRJEB55328. The CLUMA2.0 reference genome is available on the Open Research Data  
694 Repository of the Max Planck Society (EDMOND) (<https://doi.org/10.17617/3.42NMN2>; currently  
695 unpublished)

696

697

#### COMPETING INTEREST STATEMENT

698 The authors declare no conflict of interest.

699

700

#### ACKNOWLEDGMENTS

701 Kerstin Schäfer assisted with RAD sequencing library preparations and Jürgen Reunert provided  
702 animal care. We thank the members of the research group Biological Clocks for their feedback for the  
703 entire duration of the project. We also thank Diethard Tautz, Guy Reeves, and Miriam Liedvogel for  
704 their feedback in the process of writing the manuscript.

705 This work was supported by the Max Planck Society via an independent Max Planck Research Group  
706 and by an ERC Starting Grant (No 802923) awarded to Tobias S Kaiser.

707

708

#### AUTHOR CONTRIBUTIONS

709 DB tested sensitivity to tidal turbulence in various *Clunio* strains, performed crosses, RAD  
710 sequencing, QTL mapping, association mapping, co-conceived the EM algorithm, and wrote the  
711 manuscript. CP established genotyping pipeline for QTL mapping and ran SNPeff. TSK conceived  
712 and supervised the project, wrote the EM algorithm and edited the manuscript.



713

## REFERENCES

- 714 Albalat R, Cañestro C. 2016. Evolution by gene loss. *Nat Rev Genet* **17**: 379–391.
- 715 Alexa A, Rahnenführer J. 2022. topGO: Enrichment Analysis for Gene Ontology.
- 716 Andreatta G, Tessmar-Raible K. 2020. The Still Dark Side of the Moon: Molecular Mechanisms of  
717 Lunar-Controlled Rhythms and Clocks. *J Mol Biol* **432**: 3525–3546.
- 718 Armstrong JD, Texada MJ, Munjaal R, Baker DA, Beckingham KM. 2006. Gravitaxis in *Drosophila*  
719 *melanogaster*: A forward genetic screen. *Genes Brain Behav* **5**: 222–239.
- 720 Ashraf SI, Hu X, Roote J, Ip YT. 1999. The mesoderm determinant Snail collaborates with related  
721 zinc-finger proteins to control *Drosophila* neurogenesis. *EMBO Journal* **18**: 6426–6438.
- 722 Baird NA, Etter PD, Atwood TS, Currey MC, Shiver AL, Lewis ZA, Selker EU, Cresko WA, Johnson  
723 EA. 2008. Rapid SNP discovery and genetic mapping using sequenced RAD markers. *PLoS One*  
724 **3**.
- 725 Barillas-Mury C, Han YS, Seeley D, Kafatos FC. 1999. *Anopheles gambiae* Ag-STAT, a new insect  
726 member of the STAT family, is activated in response to bacterial infection. *EMBO Journal* **18**:  
727 959–967.
- 728 Bolger AM, Lohse M, Usadel B. 2014. Trimmomatic: A flexible trimmer for Illumina sequence data.  
729 *Bioinformatics* **30**: 2114–2120.
- 730 Briševac D, Peralta CM, Kaiser TS. 2022. An oligogenic architecture underlying ecological and  
731 reproductive divergence in sympatric populations. *bioRxiv* 2022.08.30.505825.
- 732 Buchfink B, Xie C, Huson DH. 2014. Fast and sensitive protein alignment using DIAMOND. *Nature*  
733 *Methods* 2014 12:1 **12**: 59–60.
- 734 Bunning E, Müller D. 1961. Wie messen Organismen lunare Zyklen? *Zeitschrift für Naturforschung B*  
735 **16**: 391–395.
- 736 Busch-Dienstfertig M, González-Rodríguez S. 2013. IL-4, JAK-STAT signaling, and pain. *JAKSTAT*  
737 **2**: e27638.
- 738 Caldart CS, Carpaneto A, Golombek DA. 2020. Synchronization of circadian locomotor activity  
739 behavior in *Caenorhabditis elegans*: Interactions between light and temperature. *J Photochem*  
740 *Photobiol B* **211**.
- 741 Chen D, Qu C, Hewes RS. 2014. Neuronal remodeling during metamorphosis is regulated by the alan  
742 shepard (shep) gene in *Drosophila melanogaster*. *Genetics* **197**: 1267–1283.
- 743 Cingolani P, Platts A, Wang LL, Coon M, Nguyen T, Wang L, Land SJ, Lu X, Ruden DM. 2012. A  
744 program for annotating and predicting the effects of single nucleotide polymorphisms, SnpEff:  
745 SNPs in the genome of *Drosophila melanogaster* strain w1118; iso-2; iso-3. *Fly (Austin)* **6**: 80–  
746 92.
- 747 Cockerham CC. 1954. An Extension of the Concept of Partitioning Hereditary Variance for Analysis  
748 of Covariances among Relatives When Epistasis Is Present. *Genetics* **39**: 859–882.
- 749 Danecek P, Auton A, Abecasis G, Albers CA, Banks E, DePristo MA, Handsaker RE, Lunter G,  
750 Marth GT, Sherry ST, et al. 2011. The variant call format and VCFtools. *Bioinformatics* **27**:  
751 2156–2158.
- 752 de Andrés MC, Imagawa K, Hashimoto K, Gonzalez A, Goldring MB, Roach HI, Oreffo ROC. 2011.  
753 Suppressors of cytokine signalling (SOCS) are reduced in osteoarthritis. *Biochem Biophys Res*  
754 *Commun* **407**: 54–59.
- 755 DeGiorgio M, Szpiech ZA. 2021. A spatially aware likelihood test to detect sweeps from haplotype  
756 distributions. *bioRxiv* 2021.05.12.443825.
- 757 Dunlap JC, Loros JJ. 2017. Making Time: Conservation of Biological Clocks from Fungi to Animals.  
758 *Microbiol Spectr* **5**.
- 759 Enright JT. 1965. Entrainment of a tidal rhythm. *Science (1979)* **147**: 864–867.

- 760 Ernstrom GG, Chalfie M. 2002. Genetics of sensory mechanotransduction. *Annu Rev Genet* **36**: 411–  
761 453.
- 762 Etter PD, Bassham S, Hohenlohe PA, Johnson EA, Cresko WA. 2011. SNP discovery and genotyping  
763 for evolutionary genetics using RAD sequencing. *Methods Mol Biol* **772**: 157–178.
- 764 Etter PD, Johnson E. 2012. RAD paired-end sequencing for local de novo assembly and SNP  
765 discovery in non-model organisms. *Methods in Molecular Biology* **888**: 135–151.
- 766 Ferrer-Admetlla A, Liang M, Korneliussen T, Nielsen R. 2014. On Detecting Incomplete Soft or Hard  
767 Selective Sweeps Using Haplotype Structure. *Mol Biol Evol* **31**: 1275–1291.
- 768 Franke H-D. 1985. On a clocklike mechanism timing lunar-rhythmic reproduction in *Typosyllis*  
769 *prolifera* (Polychaeta). *Journal of Comparative Physiology A* 1985 *156*:4 **156**: 553–561.
- 770 Fuhrmann N, Prakash C, Kaiser TS. Polygenic adaptation from standing genetic variation allows  
771 rapid ecotype formation. <https://doi.org/10.1101/2021.04.16.440113>.
- 772 Gautier M. 2015. Genome-wide scan for adaptive divergence and association with population-specific  
773 covariates. *Genetics* **201**: 1555–1579.
- 774 Gibson RN. 1971. Factors affecting the rhythmic activity of *Blennius pholis* L.(Teleostei). *Anim*  
775 *Behav* **19**: 336–343.
- 776 Goto SG, Takekata H. 2015. Circatidal rhythm and the veiled clockwork. *Curr Opin Insect Sci* **7**: 92–  
777 97.
- 778 Gupta L, Molina-Cruz A, Kumar S, Rodrigues J, Dixit R, Zamora RE, Barillas-Mury C. 2009. The  
779 STAT Pathway Mediates Late-Phase Immunity against Plasmodium in the Mosquito *Anopheles*  
780 *gambiae*. *Cell Host Microbe* **5**: 498–507.
- 781 Hastings MH. 1981. The entraining effect of turbulence on the circa-tidal activity rhythm and its  
782 semi-lunar modulation in *Eurydice pulchra*. *Journal of the Marine Biological Association of the*  
783 *United Kingdom* **61**: 151–160.
- 784 Hauenschild C. 1960. Lunar Periodicity. *Cold Spring Harb Symp Quant Biol* **25**: 491–497.
- 785 Holmstrom WF, Morgan E. 1983. Laboratory entrainment of the rhythmic swimming activity of  
786 *Corophium volutator* (Pallas) to cycles of temperature and periodic inundation. *J mar biol Ass*  
787 *UK* **63**: 861–870.
- 788 Huerta-Cepas J, Forslund K, Coelho LP, Szklarczyk D, Jensen LJ, von Mering C, Bork P. 2017. Fast  
789 Genome-Wide Functional Annotation through Orthology Assignment by eggNOG-Mapper. *Mol*  
790 *Biol Evol* **34**: 2115–2122.
- 791 Huerta-Cepas J, Szklarczyk D, Heller D, Hernández-Plaza A, Forslund SK, Cook H, Mende DR,  
792 Letunic I, Rattei T, Jensen LJ, et al. 2019. eggNOG 5.0: a hierarchical, functionally and  
793 phylogenetically annotated orthology resource based on 5090 organisms and 2502 viruses.  
794 *Nucleic Acids Res* **47**: D309–D314.
- 795 Ishikawa Y, Fujiwara M, Wong J, Ura A, Kamikouchi A. 2020. Stereotyped Combination of Hearing  
796 and Wind/Gravity-Sensing Neurons in the Johnston’s Organ of *Drosophila*. *Front Physiol* **10**.
- 797 Jones DA, Naylor E. 1970. The swimming rhythm of the sand beach isopod *Eurydice pulchra*. *J Exp*  
798 *Mar Biol Ecol* **4**: 188–199.
- 799 Kaiser TS. 2014. Local Adaptations of Circalunar and Circadian Clocks: The Case of *Clunio marinus*.  
800 In *Annual, Lunar, and Tidal Clocks*, pp. 121–141, Springer Japan.
- 801 Kaiser TS, Heckel DG. 2012. Genetic architecture of local adaptation in lunar and diurnal emergence  
802 times of the marine midge *clunio marinus* (chironomidae, diptera). *PLoS One* **7**.
- 803 Kaiser TS, Neumann D, Heckel DG. 2011. Timing the tides: genetic control of diurnal and lunar  
804 emergence times is correlated in the marine midge *Clunio marinus*. *BMC Genet* **12**.
- 805 Kaiser TS, Neumann D, Heckel DG, Berendonk TU. 2010. Strong genetic differentiation and  
806 postglacial origin of populations in the marine midge *Clunio marinus* (Chironomidae, Diptera).  
807 *Mol Ecol* **19**: 2845–2857.

- 808 Kaiser TS, Neumann J. 2021. Circalunar clocks—Old experiments for a new era. *BioEssays* **43**:  
809 2100074.
- 810 Kaiser TS, von Haeseler A, Tessmar-Raible K, Heckel DG. 2021. Timing strains of the marine insect  
811 *Clunio marinus* diverged and persist with gene flow. *Mol Ecol* **00**: 1–17.
- 812 Kamikouchi A, Inagaki HK, Effertz T, Hendrich O, Fiala A, Göpfert MC, Ito K. 2009. The neural  
813 basis of *Drosophila* gravity-sensing and hearing. *Nature* **458**: 165–171.
- 814 Karl W. Broman, Saunak Sen. 2009. *A Guide to QTL Mapping with R/qtl*. Springer.
- 815 Knaus BJ, Grünwald NJ. 2017. vcfr: a package to manipulate and visualize variant call format data in  
816 R. In *Molecular Ecology Resources*, Vol. 17 of, pp. 44–53, Blackwell Publishing Ltd.
- 817 Kunnen SJ, Malas TB, Semeins CM, Bakker AD, Peters DJM. 2018. Comprehensive transcriptome  
818 analysis of fluid shear stress altered gene expression in renal epithelial cells. *J Cell Physiol* **233**:  
819 3615–3628.
- 820 Lammerding J, Kamm RD, Lee RT. 2004. Mechanotransduction in cardiac myocytes. In *Annals of the*  
821 *New York Academy of Sciences*, Vol. 1015 of, pp. 53–70, New York Academy of Sciences.
- 822 Lee E, Helt GA, Reese JT, Munoz-Torres MC, Childers CP, Buels RM, Stein L, Holmes IH, Elsik  
823 CG, Lewis SE. 2013. Web Apollo: A web-based genomic annotation editing platform. *Genome*  
824 *Biol* **14**: 1–13.
- 825 Li H, Durbin R. 2009. Fast and accurate short read alignment with Burrows-Wheeler transform.  
826 *Bioinformatics* **25**: 1754–1760.
- 827 Li H, Handsaker B, Wysoker A, Fennell T, Ruan J, Homer N, Marth G, Abecasis G, Durbin R. 2009.  
828 The Sequence Alignment/Map format and SAMtools. *Bioinformatics* **25**: 2078–2079.
- 829 Liang J, Wang D, Renaud G, Wolfsberg TG, Wilson AF, Burgess SM. 2012. The stat3/socs3a  
830 pathway is a key regulator of hair cell regeneration in zebrafish stat3/socs3a pathway: Regulator  
831 of hair cell regeneration. *Journal of Neuroscience* **32**: 10662–10673.
- 832 Liongue C, Ward AC. 2013. Evolution of the JAK-STAT pathway. *JAKSTAT* **2**: e22756.
- 833 Liu Y, Merrow M, Loros JJ, Dunlap JC. 1998. How temperature changes reset a circadian oscillator.  
834 *Science* **281**: 825–829.
- 835 López-Olmeda JF, Madrid JA, Sánchez-Vázquez FJ. 2006. Light and temperature cycles as zeitgebers  
836 of zebrafish (*Danio rerio*) circadian activity rhythms. *Chronobiol Int* **23**: 537–550.
- 837 Malsch P, Andratsch M, Vogl C, Link AS, Alzheimer C, Brierley SM, Hughes PA, Kress M. 2014.  
838 Deletion of interleukin-6 signal transducer gp130 in small sensory neurons attenuates  
839 mechanonociception and down-regulates TRPA1 expression. *Journal of Neuroscience* **34**: 9845–  
840 9856.
- 841 McKenna A, Hanna M, Banks E, Sivachenko A, Cibulskis K, Kernytsky A, Garimella K, Altshuler D,  
842 Gabriel S, Daly M, et al. 2010. The genome analysis toolkit: A MapReduce framework for  
843 analyzing next-generation DNA sequencing data. *Genome Res* **20**: 1297–1303.
- 844 Michailova P. 1980. Comparative External Morphological and Karyological Characteristics of  
845 European Species of Genus *Clunio* Haliday, 1855 (Diptera, Chironomidae). *Chironomidae* 9–15.
- 846 Millward-Sadler SJ, Khan NS, Bracher MG, Wright MO, Salter DM. 2006. Roles for the interleukin-4  
847 receptor and associated JAK/STAT proteins in human articular chondrocyte  
848 mechanotransduction. *Osteoarthritis Cartilage* **14**: 991–1001.
- 849 Monroe JG, McKay JK, Weigel D, Flood PJ. 2021. The population genomics of adaptive loss of  
850 function. *Heredity* 2021 126:3 **126**: 383–395.
- 851 Naylor E (Ernest). 2010. *Chronobiology of marine organisms*. Cambridge University Press.
- 852 Neumann D. 1966. Die Lunare und Tägliche Schlüpfperiodik Der Mücke *Clunio* Steuerung und  
853 Abstimmung auf Die Gezeitenperiodik. *Zeitschrift für vergleichende Physiologie* **53**: 1–66.
- 854 Neumann D. 1978. Entrainment Of A Semilunar Rhythm By Simulated Tidal Cycles Of Mechanical  
855 Disturbance. *J.exp.marBiolEcol* **35**: 73–85.

- 856 Neumann D. 1967. Genetic adaptation in emergence time of *Clunio* populations to different tidal  
857 conditions.
- 858 Neumann D, Heimbach F. 1978. *Time Cues for Semilunar Reproduction Rhythms in European*  
859 *Populations of Clunio Marinus. I. The Influence of Tidal Cycles of Mechanical Disturbance.*
- 860 Neumann D, Heimbach F. 1984. Time Cues for Semilunar Reproduction Rhythms in European  
861 Populations of *Clunio marinus*. II. The Influence of Tidal Temperature Cycles. *Biological*  
862 *Bulletin* **166**: 509–524.
- 863 Northcott SJ. 1991. *A comparison of circatidal rhythmicity and entrainment by hydrostatic pressure*  
864 *cycles in the rock goby, Gobius paganellus L. and the shanny, Lipophrys pholis (L.).*
- 865 Olesnický EC, Antonacci S, Popitsch N, Lybecker MC, Titus MB, Valadez R, Derkach PG, Marean  
866 A, Miller K, Mathai SK, et al. 2018. Shep interacts with posttranscriptional regulators to control  
867 dendrite morphogenesis in sensory neurons. *Dev Biol* **444**: 116–128.
- 868 Pinti M, Gibellini L, Nasi M, de Biasi S, Bortolotti CA, Iannone A, Cossarizza A. 2016. Emerging  
869 role of Lon protease as a master regulator of mitochondrial functions. *Biochimica et Biophysica*  
870 *Acta (BBA) - Bioenergetics* **1857**: 1300–1306.
- 871 Pittendrigh SC. 1960. Circadian Rhythms and the Circadian Organization of Living Systems. *Cold*  
872 *Spring Harb Symp Quant Biol* **25**: 159–184.
- 873 Raible F, Takekata H, Tessmar-Raible K. 2017. An overview of monthly rhythms and clocks. *Front*  
874 *Neurol* **8**.
- 875 Reid DG, Naylor E. 1985. Free-running, endogenous semilunar rhythmicity in a marine isopod  
876 crustacean. *Journal of the Marine Biological Association of the United Kingdom* **65**: 85–91.
- 877 Reineke A, Karlovsky P, Zebitz CPW. 1998. Preparation and purification of DNA from insects for  
878 AFLP analysis. *Insect Mol Biol* **7**: 95–99.
- 879 Roscito JG, Sameith K, Parra G, Langer BE, Petzold A, Moebius C, Bickle M, Rodrigues MT, Hiller  
880 M. 2018. Phenotype loss is associated with widespread divergence of the gene regulatory  
881 landscape in evolution. *Nature Communications* *2018 9:1* **9**: 1–15.
- 882 Sackton TB, Grayson P, Cloutier A, Hu Z, Liu JS, Wheeler NE, Gardner PP, Clarke JA, Baker AJ,  
883 Clamp M, et al. 2019. Convergent regulatory evolution and loss of flight in paleognathous birds.  
884 *Science (1979)* **364**: 74–78.
- 885 Saigusa M. 1980. Entrainment of a semilunar rhythm by a simulated moonlight cycle in the terrestrial  
886 crab, *Sesarma haematocheir*. *Oecologia* *1980 46:1* **46**: 38–44.
- 887 Sedlazeck FJ, Rescheneder P, von Haeseler A. 2013. NextGenMap: Fast and accurate read mapping  
888 in highly polymorphic genomes. *Bioinformatics* **29**: 2790–2791.
- 889 Shah SK, Fogle LN, Aroom KR, Gill BS, Moore-Olufemi SD, Jimenez F, Uray KS, Walker PA,  
890 Stewart RH, Laine GA, et al. 2010. Hydrostatic intestinal edema induced signaling pathways:  
891 Potential role of mechanical forces. *Surgery* **147**: 772–779.
- 892 Sifuentes-Romero I, Ferrufino E, Thakur S, Laboissonniere LA, Solomon M, Smith CL, Keene AC,  
893 Trimarchi JM, Kowalko JE. 2020. Repeated evolution of eye loss in Mexican cavefish: Evidence  
894 of similar developmental mechanisms in independently evolved populations. *J Exp Zool B Mol*  
895 *Dev Evol* **334**: 423–437.
- 896 Simoni A, Wolfgang W, Topping MP, Kavlie RG, Stanewsky R, Albert JT. 2014. A mechanosensory  
897 pathway to the drosophila circadian clock. *Science (1979)* **343**: 525–528.
- 898 Souza-Neto JA, Sim S, Dimopoulos G. 2009. An evolutionary conserved function of the JAK-STAT  
899 pathway in anti-dengue defense. *Proc Natl Acad Sci U S A* **106**: 17841–17846.
- 900 Sun Y, Liu L, Ben-Shahar Y, Jacobs JS, Eberl DF, Welsh MJ. 2009. TRPA channels distinguish  
901 gravity sensing from hearing in Johnston’s organ. *Proc Natl Acad Sci U S A* **106**: 13606–13611.
- 902 Szpiech ZA, Hernandez RD. 2016. Selective Sweeps. *Encyclopedia of Evolutionary Biology* 23–32.

- 903 Szpiech ZA, Novak TE, Bailey NP, Stevison LS. 2021. Application of a novel haplotype-based scan  
904 for local adaptation to study high-altitude adaptation in rhesus macaques. *Evol Lett* **5**: 408–421.
- 905 Takahashi JS. 2017. Transcriptional architecture of the mammalian circadian clock. *Nat Rev Genet*  
906 **18**: 164–179.
- 907 Taylor AC, Naylor E. 1977. Entrainment of the locomotor rhythm of *Carcinus* by cycles of salinity  
908 change. *Journal of the Marine Biological Association of the United Kingdom* **57**: 273–277.
- 909 Wager-Smith K, Kay SA. 2000. Circadian rhythm genetics: from flies to mice to humans. *Nat Genet*  
910 **26**: 23–27.
- 911 Wang S, Basten CJ, Zeng Z-B. 2012. Windows QTL Cartographer 2.5.  
912 <http://statgen.ncsu.edu/qtlcart/WQTLCart.htm>.
- 913 Wang Y, Levy DE. 2012. Comparative evolutionary genomics of the STAT family of transcription  
914 factors. *JAKSTAT* **1**: 23–36.
- 915 Wilcockson D, Zhang L. 2008. Circatidal clocks. *Current Biology* **18**: R753–R755.
- 916 Williams BG, Naylor E. 1969. Synchronization of the locomotor tidal rhythm of *Carcinus*. *Journal of*  
917 *Experimental Biology* **51**: 715–725.
- 918 Yandell BS, Mehta T, Banerjee S, Shriner D, Venkataraman R, Moon JY, Neely WW, Wu H, von  
919 Smith R, Yi N. 2007. R/qtlbim: QTL with Bayesian Interval Mapping in experimental crosses.  
920 *Bioinformatics* **23**: 641–643.
- 921 Zhang J, Kobert K, Flouri T, Stamatakis A. 2014. PEAR: A fast and accurate Illumina Paired-End  
922 reAd mergeR. *Bioinformatics* **30**: 614–620.
- 923
